1 **The conserved endocannabinoid anandamide modulates olfactory sensitivity to induce**  
2 **hedonic feeding in *C. elegans***

3

4 Anastasia Levichev<sup>1</sup>, Serge Faumont<sup>1</sup>, Rachel Z. Berner<sup>1</sup>, Zhifeng Purcell<sup>1</sup>, Shawn R. Lockery<sup>1\*</sup>

5 <sup>1</sup>Institute of Neuroscience, University of Oregon, Eugene, Oregon, USA

6 \*Author for correspondence: [Shawn@uoregon.edu](mailto:Shawn@uoregon.edu)

7

8 **Abstract**

9 The ability of cannabis to increase consumption of food has been known for centuries. In  
10 addition to producing hyperphagia, cannabinoids can amplify existing preferences for calorically  
11 dense, palatable food sources, a phenomenon called hedonic feeding. These effects result from  
12 the action of plant-derived cannabinoids on brain receptors where they mimic natural ligands  
13 called endocannabinoids. The high degree of conservation of cannabinoid signaling at the  
14 molecular level across the animal kingdom suggests hedonic feeding may also be widely  
15 conserved. Here we show that exposure of *C. elegans* to anandamide, an endocannabinoid  
16 common to nematodes and mammals, shifts both appetitive and consummatory responses toward  
17 nutritionally superior food, an effect analogous to hedonic feeding. We find that anandamide's  
18 effect on feeding requires the *C. elegans* cannabinoid receptor NPR-19 but it can also be  
19 mediated by the human CB1 cannabinoid receptor, indicating functional conservation between  
20 the nematode and mammalian endocannabinoid systems for regulation of food preferences.  
21 Furthermore, the effect of anandamide in *C. elegans* is bidirectional, as it increases appetitive  
22 and consummatory responses to superior food but decreases these responses to inferior food.  
23 This bidirectionality is mirrored at the cellular level. Anandamide's behavioral effects require the  
24 AWC chemosensory neurons, and anandamide renders these neurons more sensitive to superior  
25 food and less sensitive to inferior food. Our findings reveal a surprising degree of functional  
26 conservation in the effects of endocannabinoids on hedonic feeding across species and establish  
27 a new system in which to investigate the cellular and molecular basis of endocannabinoid system  
28 function in the regulation of food choice.

29

30

31

## 32 **Introduction**

33 It has been known for centuries that smoking or ingesting preparations of the plant *Cannabis*  
34 *sativa* stimulates appetite (Abel, 1971; Kirkham & Williams, 2001). Users report persistent  
35 hunger while intoxicated, even if previously satiated. This feeling of hunger is often  
36 accompanied by a strong and specific desire for foods that are sweet or high in fat content, a  
37 phenomenon colloquially known as “the munchies” (Abel, 1975; Foltin et al., 1986, 1988;  
38 Halikas et al., 1971; Hollister, 1971; Tart, 1970). The effects of cannabinoids on appetite result  
39 mainly from  $\Delta^9$ -tetrahydrocannabinol (THC), a plant-derived cannabinoid. THC acts at  
40 cannabinoid receptors in the brain where it mimics endogenous ligands called endocannabinoids,  
41 which include N-arachidonylethanolamine (AEA) and 2-arachidonoylglycerol (2-AG). AEA  
42 and 2-AG are the best studied signaling molecules of the mammalian endocannabinoid system,  
43 which comprises the cannabinoid receptors CB1 and CB2, metabolic enzymes for synthesis and  
44 degradation of the endocannabinoids, and a variety of ancillary proteins involved in receptor  
45 trafficking and modulation (Bauer et al., 2012; Fu et al., 2011; Jin et al., 1999; Kaczocha et al.,  
46 2009, 2012; Liedhegner et al., 2014; Martini et al., 2007; Oddi et al., 2009; Rozenfeld & Devi,  
47 2008).

48  
49 A large number of studies in laboratory animals have established a strong link between  
50 endocannabinoid signaling and energy homeostasis, defined as the precise matching of caloric  
51 intake with energy expenditure to maintain body weight (Cristino et al., 2014). Food deprivation  
52 increases endocannabinoid levels in the limbic forebrain, which includes the nucleus accumbens  
53 and hypothalamus, two brain regions that express CB1 receptors and contribute to the appetitive  
54 drive for food (Kirkham et al., 2002). Systemic administration of THC or endogenous  
55 cannabinoids increases feeding (Williams & Kirkham, 1999). Similarly, micro-injection of  
56 cannabinoid receptor agonists or endocannabinoids directly into the nucleus accumbens also  
57 increases feeding (Deshmukh & Sharma, 2012; Mahler et al., 2007). Thus, the endocannabinoid  
58 system can be viewed as a short-latency effector system for restoring energy homeostasis under  
59 conditions of food deprivation (Cristino et al., 2014; Devane et al., 1988; Munro et al., 1993;  
60 Parker, 2017).

61

62 To respond effectively to an energy deficit, an animal should be driven both to seek food  
63 (*appetitive* behavior) and, once food is encountered, to maximize caloric intake (*consummatory*  
64 behavior). The endocannabinoid system is capable of orchestrating both aspects of this response  
65 simultaneously. With respect to appetitive behavior, CB1 agonists reduce the latency to feed  
66 (Freedland et al., 2000; Gallate et al., 1999; Gallate & McGregor, 1999; Maccioni et al., 2008;  
67 McLaughlin et al., 2003; Salamone et al., 2007; Thornton-Jones et al., 2005) and induce animals  
68 to expend more effort to obtain a given food or liquid reward (Barbano et al., 2009; Freedland et  
69 al., 2000; Gallate et al., 1999; Guegan et al., 2013), whereas CB1 antagonists have the opposite  
70 effect (Freedland et al., 2000; Gallate et al., 1999; Gallate & McGregor, 1999; Maccioni et al.,  
71 2008; McLaughlin et al., 2003; Salamone et al., 2007; Thornton-Jones et al., 2005). With respect  
72 to consummatory behavior, studies in rodents show that administration of THC or  
73 endocannabinoids specifically alters food preferences in favor of palatable, calorically dense  
74 foods, such as those laden with sugars and fats, as opposed to laboratory pellets. For example,  
75 THC causes rats to consume larger quantities of chocolate cake batter without affecting  
76 consumption of simultaneously available laboratory pellets (Koch & Matthews, 2001). It also  
77 causes them to consume larger quantities of sugar water than plain water, and of dry pellets than  
78 watered-down pellet mash, which is calorically dilute (Brown et al., 1977). Administration of  
79 endocannabinoids, including microinjection into the nucleus accumbens, has similar effects,  
80 which can be blocked by simultaneous administration of CB1 antagonists (Deshmukh & Sharma,  
81 2012; Escartín-Pérez et al., 2009a; Shinohara et al., 2009). CB1 antagonists, administered alone,  
82 specifically suppress consumption of sweet and fatty foods in rats (Arnone et al., 1997; Gessa et  
83 al., 2006; Mathes et al., 2008) as well as in primates (Simiand et al., 1998), indicating that basal  
84 endocannabinoid titers can be regulated up or down to re-establish energy homeostasis.

85  
86 There is considerable support for the hypothesis that animals treated with cannabinoids consume  
87 larger quantities of calorically dense foods because cannabinoids amplify the pleasurable or  
88 rewarding aspects of these foods. This phenomenon has been termed *hedonic amplification*  
89 (Castro & Berridge, 2017; Mahler et al., 2007), whereas the food-specific increase in  
90 consumption it engenders has been termed *hedonic feeding* (Edwards & Abizaid, 2016).  
91 Inferences concerning pleasurable and rewarding aspects of animal experience can be difficult to  
92 establish, but both THC and AEA specifically increase the vigor of licking at spouts delivering

93 sweet fluids (Davis & Smith, 1992; Higgs et al., 2003). In a more direct measure of hedonic  
94 responses, the frequency of orofacial movements previously shown to be associated with highly  
95 preferred foods can be monitored in response to oral delivery of a sucrose solution (Grill &  
96 Norgren, 1978). Injection of THC or a CB1 antagonist respectively increases or decreases this  
97 frequency (Jarrett et al., 2005), suggesting that pleasure may have been increased by cannabinoid  
98 administration.

99

100 Cannabinoid effects on hedonic responses may be at least partially chemosensory in origin,  
101 including both taste (gustation) and smell (olfaction). With respect to gustation, a majority of  
102 sweet-sensitive taste cells in the mouse tongue are immunoreactive to CB1, and a similar  
103 proportion shows increased response to saccharin, sucrose, and glucose following  
104 endocannabinoid administration (Yoshida et al., 2010, 2013). These effects are recapitulated in  
105 afferent nerves from the tongue (Yoshida et al., 2010), as administration of AEA or 2-AG  
106 specifically increases chorda tympani responses to sweeteners rather than NaCl (salt), HCl  
107 (sour), quinine (bitter), or monosodium glutamate (umami). With respect to olfaction, CB1  
108 receptors expressed in the olfactory bulb are required for post-fasting hyperphagia in mice, and  
109 THC decreases the threshold of food-odor detection during exploratory behavior (Soria-Gómez  
110 et al., 2014).

111

112 The high degree of conservation of the endocannabinoid system at the molecular level is well  
113 established (Elphick, 2012). Although CB1 and CB2 receptors are unique to chordates, there are  
114 numerous candidates for cannabinoid receptors in most animals. Furthermore, orthologs of the  
115 enzymes involved in biosynthesis and degradation of endocannabinoids occur throughout the  
116 animal kingdom. This degree of molecular conservation, coupled with the universal need in all  
117 organisms to regulate energy balance, suggests the hypothesis that hedonic amplification and  
118 hedonic feeding are also widely conserved, but studies in animals other than rodents and  
119 primates appear to be lacking.

120

121 The present study tests the hypothesis that the hedonic effects of cannabinoids are conserved in  
122 the nematode *C. elegans*. This organism diverged from the line leading to mammals more than  
123 500 million years ago (Raible & Arendt, 2004). Nevertheless, *C. elegans* has a fully elaborated

124 endocannabinoid signaling system including: (i) a functionally validated endocannabinoid  
125 receptor NPR-19, which is encoded by the gene *npr-19* (Oakes et al., 2017); (ii) the  
126 endocannabinoids AEA and 2-AG, which it shares with mammals (Higgs et al., 2003; Lehtonen  
127 et al., 2008, 2011; Sugiura et al., 1995), (iii) orthologs of the mammalian endocannabinoid  
128 synthesis enzymes NAPE-1 and NAPE-2, and DAGL (Harrison et al., 2014), and (iv) orthologs  
129 of endocannabinoid degradative enzymes FAAH and MAGL (Y97E10AL.2 in worms) (Oakes et  
130 al., 2017). Endocannabinoid signaling in *C. elegans* is so far known to contribute to six main  
131 phenotypes: (i) axon navigation during regeneration (Pastuhov et al., 2012, 2016), (ii) lifespan  
132 regulation related to dietary restriction (Harrison et al., 2014; Lucanic et al., 2011) (iii) altered  
133 progression through developmental stages (Harrison et al., 2014; Reis-Rodrigues et al., 2016),  
134 (iv) suppression of nociceptive withdrawal responses (Oakes et al., 2017), (v) inhibition of  
135 feeding rate (Oakes et al., 2017), and (vi) inhibition of locomotion (Oakes et al., 2017, 2019).  
136 Despite considerable conservation between the *C. elegans* and mammalian endocannabinoid  
137 systems, to our knowledge the effects of cannabinoids on food preference in *C. elegans* have not  
138 been described.

139  
140 The feeding ecology of *C. elegans* supports the possibility of hedonic feeding in this organism.  
141 *C. elegans* feeds on bacteria in decaying plant matter (Frézal & Félix, 2015). It finds bacteria by  
142 chemotaxis driven by a combination of gustatory and olfactory cues (Bargmann et al., 1993;  
143 Bargmann & Horvitz, 1991). Bacteria are ingested through the worm's pharynx, a rhythmically  
144 active muscular pump that constitutes the animal's throat. Although *C. elegans* is an omnivorous  
145 bacterivore, different species of bacteria have a characteristic quality as a food source defined by  
146 the rate of growth of individual worms feeding on that species ( $\Delta$  length/unit time). Hatchlings  
147 are naïve to food quality but in a matter of hours begin to exhibit a preference for nutritionally  
148 superior species (*favored*) over nutritionally inferior species (*non-favored*) (Shtonda, 2006).

149  
150 Here we show that transient exposure of *C. elegans* to the endocannabinoid AEA simultaneously  
151 biases appetitive and consummatory responses toward favored food. With respect to appetitive  
152 responses, the fraction of worms approaching and dwelling on patches of favored food increases  
153 whereas the fraction approaching and dwelling on non-favored food decreases. With respect to  
154 consummatory responses, feeding rate in favored food increases whereas feeding rate in non-

155 favored food decreases. Taken together, the appetite and consummatory manifestations of  
156 cannabinoid exposure in *C. elegans* imply increased consumption of favored food characteristic  
157 of hedonic feeding. We also find that AEA's effects require the NPR-19 cannabinoid receptor.  
158 Further, AEA's effects persist when *npr-19* is replaced by the human CB1 receptor gene CNR1,  
159 indicating a high degree of conservation between the nematode and mammalian  
160 endocannabinoid systems. At the neuronal level, we find that under the influence of AEA, AWC,  
161 a primary olfactory neuron required for chemotaxis to food, becomes more sensitive to favored  
162 food and less sensitive to non-favored food. Together, our findings indicate that the hedonic  
163 effects of endocannabinoids are conserved in *C. elegans*.

164

## 165 **Results**

### 166 **AEA exposure increases preference for favored food**

167 We pre-exposed well-fed, adult, wild type (N2 Bristol) worms to the endocannabinoid AEA by  
168 incubating them for 20 min at a concentration of 100  $\mu$ M. Food preference was measured by  
169 placing a small population of worms at the starting point of a T-maze baited with patches of  
170 favored and non-favored bacteria at equal optical densities (OD<sub>600</sub> 1), where optical density  
171 served as a proxy for bacteria concentration (see Materials and Methods; Fig. 1A). This assay is  
172 analogous to assays used in mammalian studies in which both palatable and standard food  
173 options are simultaneously available (Brown et al., 1977; Deshmukh & Sharma, 2012; Escartín-  
174 Pérez et al., 2009a; Koch & Matthews, 2001; Shinohara et al., 2009). The number of worms in  
175 each food patch was counted at 15-minute intervals for one hour. At each time point, we  
176 quantified preference in terms of the index  $I = (n_F - n_{NF}) / (n_F + n_{NF})$ , where  $n_F$  and  $n_{NF}$  are  
177 the number of worms in favored and non-favored food, respectively, and  $I = 0$  indicates  
178 indifference between the two food types. We found that AEA exposure increased preference for  
179 favored food (Fig. 1B, C; Suppl. Table 1, line 2). This effect lasted at least 60 minutes without  
180 significant decrement (Fig. 1B; Suppl. Table 1, line 3-4) despite the absence of AEA on the  
181 assay plates. Thus, the amount of AEA absorbed by worms during the exposure period was  
182 sufficient to maintain the increased preference for favored food throughout the observation  
183 period.

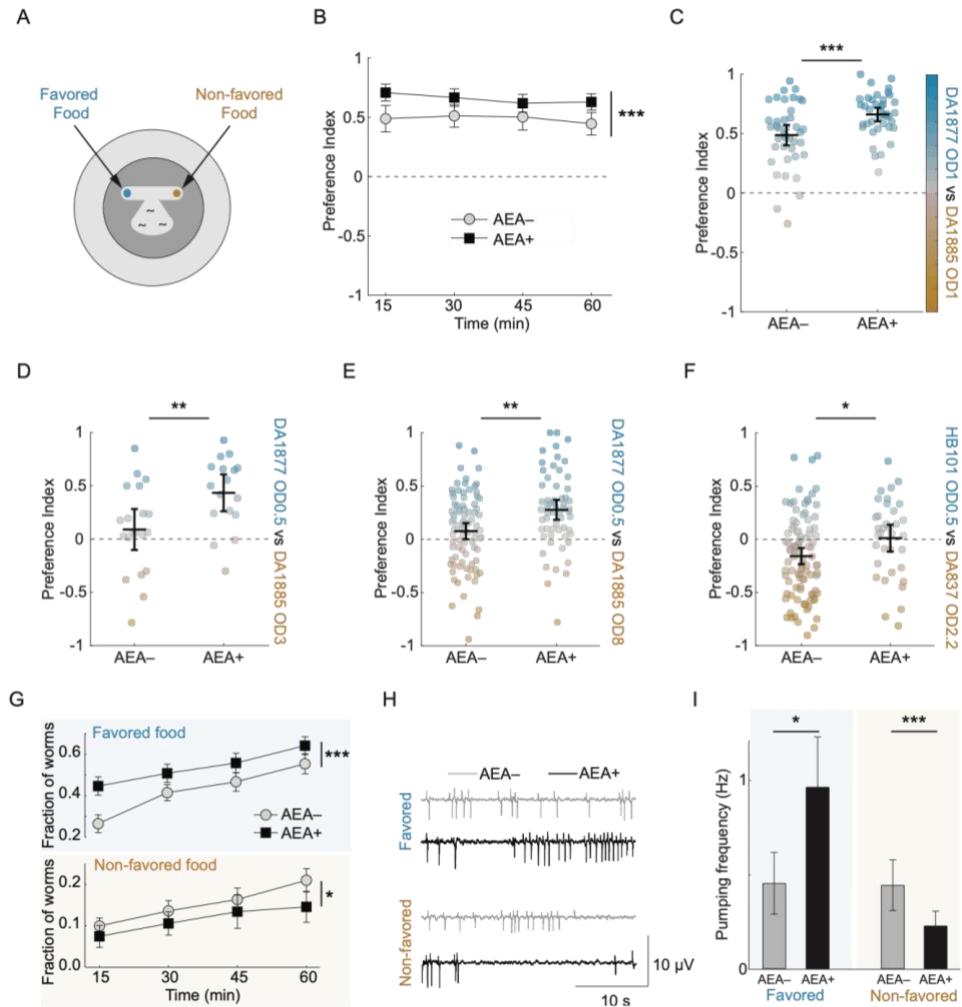

**Fig 1. AEA-mediated hedonic feeding.**

**A.** Food preference assay. T-maze arms were baited with patches of favored (blue) and non-favored (orange) bacteria. **B.** Mean preference index ( $I$ ) versus time for AEA-exposed animals (AEA+) and unexposed controls (AEA-), where  $I > 0$  is preference for favored food,  $I < 0$  is preference for non-favored food, and  $I = 0$  is indifference (dashed line). Favored food, DA1877, OD 1; non-favored food, DA1885, OD 1. **C.** Summary of the data in **B**. Each dot is mean preference over time in a single T-maze assay. Dot color indicates preference index according to the color scale on the right. **D, E.** Effect of AEA on

preference when baseline preference is at the indifference point (symbols as in **C**). For preference time courses, see Supp. Fig. 1. In **D**: Favored food, DA1877, OD 0.5; non-favored food, DA1885, OD 3. In **E**: favored food, DA1877, OD 0.5; non-favored food, DA1885, OD 8. **F.** Effect of AEA on preference for a different pair of favored and non-favored bacteria (symbols as in **C**). Favored food, HB101, OD 0.5; non-favored food, DA837, OD 2.2. For preference time course, see Supp. Fig. 1. **G.** Effect of AEA on fraction of worms in favored and non-favored food patches versus time. Same experiment as in panels **B, C**. **H, I.** Effect of AEA on pharyngeal pumping in favored versus non-favored food. Favored food, DA1877, OD 0.8; non-favored food, DA1885, OD 0.8. **H** shows electrical recordings of four individual worms under the conditions shown. Each spike is the electrical correlate of one pump. Traces were selected to represent the population median pumping frequency in each condition. **I** shows mean pumping frequency in each condition. For statistics in **B-G** and **I**, see Supp. Table 1. Symbols: \*,  $p < 0.05$ ; \*\*,  $p < 0.01$ ; \*\*\*,  $p < 0.001$ ; n.s., not significant. Error bars, 95% confidence interval.

184

185 A simple interpretation of the data in Fig. 1B, C is that AEA exposure specifically increases the

186 relative attractiveness of favored food. However, an alternative interpretation is that AEA

187 promotes the attractiveness of whichever food is already preferred under the baseline conditions

188 of the experiment (AEA-). To test this possibility, we titrated the densities of favored and non-

189 favored food so that under baseline conditions neither food was preferred ( $I \approx 0$ ; Fig. 1D, E;  
190 Suppl. Fig. 1A, B). Under these conditions, AEA still increased the preference for favored food  
191 (Suppl. Table 1, line 6, 10). This finding supports the hypothesis that AEA differentially affects  
192 accumulation based on food identity, not relative food density. Finally, we found that AEA's  
193 effect on preference generalized to a different pair of favored and non-favored bacteria (Fig. 1F;  
194 Suppl. Fig. 1C; Suppl. Table 1, line 14). Taken together, the data in Fig. 1B-F show that AEA's  
195 ability to increase preference for favored food is not limited to a particular pair of foods or their  
196 relative concentrations.

197  
198 In mammals, cannabinoid administration can differentially increase responses to favored versus  
199 non-favored food. Because worms in the T-maze assay could occupy foodless regions of the  
200 assay plate in addition to the food patches themselves, the increased accumulation in favored  
201 food could represent an increased appetitive response to favored food, a decreased appetitive  
202 response to non-favored food, or both. Further analysis revealed that AEA exposure increased  
203 the fraction of worms in favored food and decreased the fraction in non-favored food (Fig. 1G;  
204 Suppl. Table 1, line 18, 22). Thus, AEA exposure produces a bidirectional effect on appetitive  
205 responses to favored versus non-favored food, the net result of which is increased accumulation  
206 in favored food.

207  
208 Are these food-specific appetitive responses accompanied by food-specific changes in  
209 consumption behavior? *C. elegans* swallows bacteria by means of rhythmic contractions of its  
210 pharynx, a muscular organ comprising its throat; each contraction is called a pump. We recorded  
211 pumping electrically in individual worms restrained in a microfluidic channel with integrated  
212 electrodes (Lockery et al., 2012; David M. Raizen & Avery, 1994). The channel contained either  
213 favored or non-favored food and pumping was recorded for 1 min following a 3 min  
214 accommodation period. Under these conditions, pumping rate is a reasonable proxy for the  
215 amount of food consumed because food concentration at this optical density is effectively  
216 constant. Unexposed worms pumped at equal frequencies in the presence of favored and non-  
217 favored species (Fig. 1H, I; Suppl. Table 1, line 25). However, under the influence of AEA,  
218 pumping frequency in favored food increased whereas pumping frequency in non-favored food



219 decreased (Fig. 1H, I; Suppl. Table 1, line 26-27). Thus, the effects of AEA exposure on food  
220 consumption mirror its bidirectional effects on accumulation shown in Fig. 1G.

221  
222 Taken together, the results in Fig. 1 demonstrate clear homologies between the effects of  
223 cannabinoids on feeding behavior in nematodes and mammals in two key respects. First, AEA  
224 differentially alters *appetitive* responses to favored and non-favored food, causing more worms  
225 to accumulate in the former and fewer in the latter. Second, AEA differentially alters  
226 *consummatory* responses measured in terms of feeding rate, causing individual worms to  
227 consume more favored food and less non-favored food per unit time. The appetitive and  
228 consummatory effects of AEA, acting in concert, are consistent with a selective increase in  
229 consumption of favored food, which is phenomenologically analogous to hedonic feeding in  
230 mammals (Edwards & Abizaid, 2016).

231  
232 **AEA differentially modulates chemosensory responses to favored and non-favored food**

233 In theoretical terms, accumulation in a food patch is determined by just two factors: entry rate  
234 and exit rate. Previous studies in *C. elegans* have shown that both rates can contribute to  
235 differential accumulation in one food versus another (Shtonda, 2006). Thus, AEA could  
236 modulate appetitive responses by acting on entry, exit rate, or both. Chemotaxis toward food  
237 patches is driven by olfactory neurons responding to airborne cues encountered at a distance  
238 (Bargmann et al., 1993; Bargmann & Horvitz, 1991). Thus, changes in entry rate might implicate  
239 changes in the function of olfactory neurons. A simple but powerful way to examine the  
240 contribution of entry rate is to spike food patches with a paralytic agent so worms that enter a  
241 patch cannot leave, thereby setting exit rate to zero. Under these conditions, if AEA exposure  
242 still modulates relative preference for favored versus non-favored food, then AEA must be  
243 differentially altering the entry rate into the two foods. To test this, we added sodium azide, a  
244 paralytic agent commonly used to immobilize nematodes (Hart, 2006), to both food patches in  
245 the T-maze. We found that AEA still produced a marked increase in preference for favored food  
246 (Fig. 2A; Suppl. Table 2, line 2), showing that it differentially affects patch entry rates.

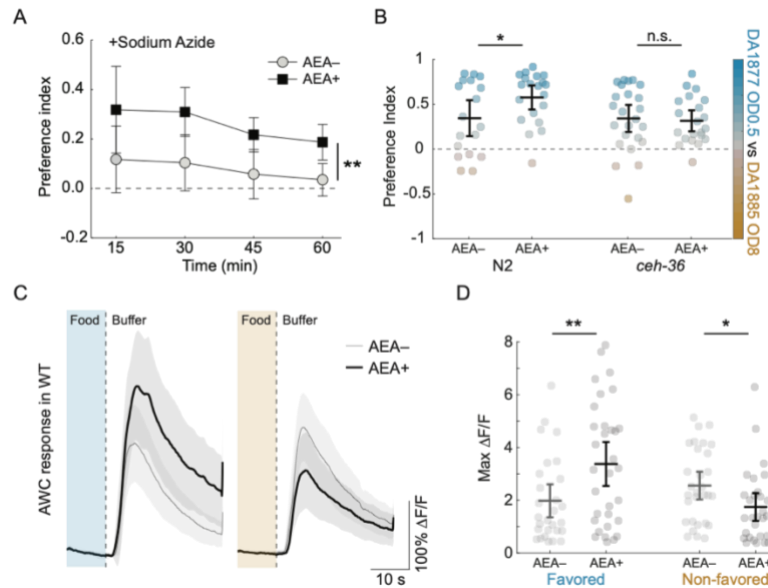

**Fig 2. Chemosensory correlate of hedonic feeding.**

**A.** Mean preference index ( $I$ ) versus time for AEA-exposed animals (AEA+) and unexposed controls (AEA-) when sodium azide was added to food patches. Favored food, DA1877, OD 0.5; non-favored food, DA1885, OD 3. **B.** Effect of AEA on preference in wild type (N2) and *ceh-36* mutants. Favored food, DA1877, OD 0.5; non-favored DA1885, OD 8. Each dot is mean preference in a single T-maze assay. **C.** Effect of AEA on the response of AWC neurons to the removal of favored or non-favored food. Each trace is average normalized fluorescence change ( $\Delta F/F$ ) versus time. Favored food (blue), DA1877, OD 1; non-favored food (orange), DA1885, OD 1. **D.** Summary of the data in in C,

showing mean peak  $\Delta F/F$ . For statistics in **A-D**, see Supp. Table 2. Symbols: \*,  $p < 0.05$ ; \*\*,  $p < 0.01$ ; n.s., not significant. Error bars and shading, 95% confidence interval.

247

248 Having found that AEA alters food-patch entry rates, we next considered the possibility that  
 249 AEA acts on olfactory neurons to produce the appetitive component of hedonic feeding. *C.*  
 250 *elegans* senses food or food-related compounds by means of 11 classes of chemosensory neurons  
 251 (two neurons/class), which have sensory endings in the anterior sensilla near the mouth  
 252 (Bargmann et al., 1993; Zaslaver et al., 2015). We focused on the AWC class, a pair of olfactory  
 253 neurons that responds directly to many volatile odors (Leinwand et al., 2015) and is required for  
 254 chemotaxis to them (Bargmann et al., 1993). To investigate whether AEA acts on AWC to alter  
 255 food preference, we measured AEA's effect on preference in *ceh-36* mutants, in which AWC  
 256 function is selectively impaired. This gene is expressed only in AWC and the gustatory neuron  
 257 class ASE. *ceh-36* is required for normal expression levels of genes essential for chemosensory  
 258 transduction, particularly in AWC (Koga & Ohshima, 2004; Lanjuin et al., 2003). Accordingly,  
 259 *ceh-36* mutants are strongly defective in their chemotaxis responses to three food-related  
 260 odorants that directly activate AWC (Lanjuin et al., 2003). Although ASE neurons are required  
 261 for chemotaxis to at least one AWC-sensed odorant (Leinwand et al., 2015), they do not respond  
 262 directly to these compounds; rather, they inherit their response via peptidergic signaling from  
 263 AWC. Thus, loss of appetitive responses in *ceh-36* mutants can be attributed to AWC neurons.

264

265 In T-maze assays, we found a modest strain  $\times$  AEA interaction ( $p = 0.08$ ), and a significant  
266 effect of AEA in wild type animals which was absent in the mutants (Fig. 2B; Suppl. Fig. 2A, B;  
267 Suppl. Table 2, line 6, 10-11, 13). This finding indicates that AWC is required for the appetitive  
268 component of hedonic feeding. With respect to the consummatory component, whereas AEA  
269 exposure had no effect on pumping frequency of *ceh-36* null worms in non-favored food, it still  
270 increased pumping frequency in favored food, just as it did in wild type worms (Suppl. Fig. 3,  
271 Suppl. Table 5, line 1-2), indicating that *ceh-36* is partially required for the consummatory  
272 component of hedonic feeding. Taken together, these data suggest that AWC is required for the  
273 normal magnitude of both components of hedonic feeding.

274  
275 AWC is activated by *decreases* in the concentration of food or food-related odors (Calhoun et  
276 al., 2015; Chalasani et al., 2007; Zaslaver et al., 2015). AWC can nevertheless promote  
277 *attraction* to food patches because its activation truncates locomotory head bends away from the  
278 odor source, thereby steering the animal toward the odor source. Additionally, its activation  
279 causes the animal to stop moving forward, reverse, and resume locomotion in a new direction  
280 better aligned with the source; this behavioral motif is known as a pirouette (Pierce-Shimomura  
281 et al., 1999). To test whether AEA alters AWC sensitivity to favored and non-favored food, we  
282 compared AWC calcium transients in response to the removal of either type of food in wild type  
283 worms exposed to AEA, and in unexposed controls. In unexposed animals, AWC neurons  
284 responded equally to the removal of either food (Fig. 2C, D, Suppl. Table 2, line 21). However,  
285 exposure to AEA caused a dramatic change in food sensitivity, increasing AWC's response to  
286 the removal of favored food and decreasing its response to the removal of non-favored food (Fig.  
287 2C, D, Suppl. Table 2, line 17, 19-20, 22). This bidirectional effect mirrors AEA's effect on both  
288 the appetitive and consummatory aspects of hedonic feeding (Fig. 1G, I) and is consistent with a  
289 model in which hedonic feeding is triggered at least in part by modulation of chemosensation in  
290 AWC neurons.

291

### 292 **Dissection of signaling pathways required for hedonic feeding**

293 The NPR-19 receptor has been shown to be required for AEA-mediated suppression of  
294 withdrawal responses and feeding rate (Oakes et al., 2017). To test whether *npr-19* is required  
295 for hedonic feeding, we measured food preference in *npr-19* null mutants following exposure to

296 AEA. Mutant worms failed to exhibit increased preference for favored food (Fig. 3A; Suppl. Fig.  
297 2C, D; Suppl. Table 3, line 6-7). This defect was rescued by over-expressing *npr-19* under  
298 control of the native *npr-19* promoter (Fig. 3A; Suppl. Fig. 2C, E; Suppl. Table 3, line 11-12, 15-  
299 16, 18). We conclude that *npr-19* is required for the appetitive component of hedonic feeding.  
300 This defect was also rescued by over-expressing the human cannabinoid receptor CB1 under the  
301 same promoter (Fig. 3A; Suppl. Fig. 2F; Suppl. Table 3, line 20-21, 24-25, 27). This finding  
302 indicates a remarkable degree of conservation between the nematode and human  
303 endocannabinoid systems. With respect to the consummatory component of hedonic feeding, the  
304 role of *npr-19* was unclear: *npr-19* mutant worms exhibited only a partial phenotype which was  
305 not rescued by overexpression of either *npr-19* or CNR1 (Suppl. Fig. 3), despite evidence of  
306 rescue in a previous study (Oakes et al., 2017). Significant differences in experimental approach  
307 might explain this discrepancy (see Materials and Methods).  
308

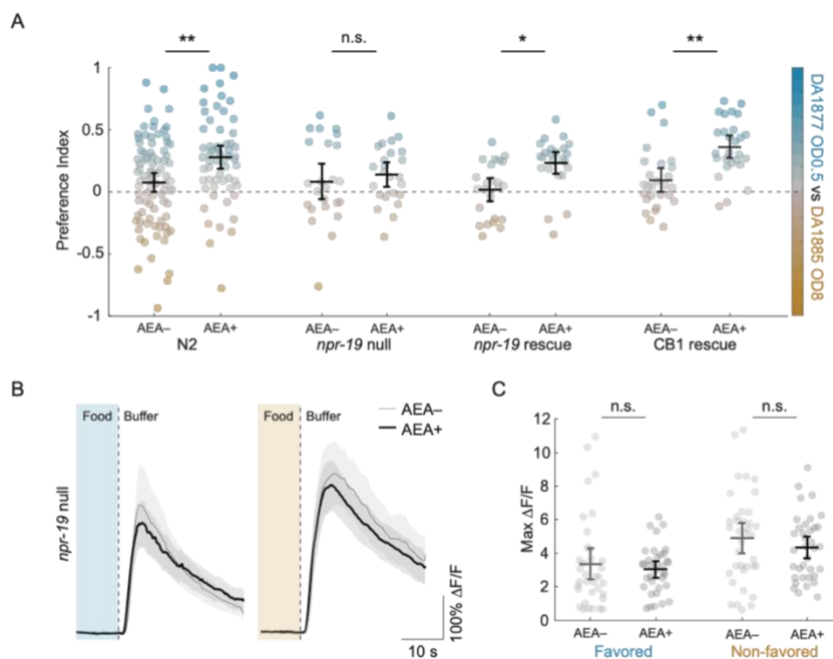

**Fig 3. Requirement of NPR-19 for hedonic feeding and chemosensory modulation.** **A.** Effect of AEA on preference in wild type worms (N2) and the indicated genetic background. Favored food, DA1877, OD 0.5; non-favored food, DA1885, OD 8. Each dot is mean preference over time in a single T-maze assay. *Dot color* indicates preference index according to the color scale on the right. **B.** Effect of AEA on the response of AWC neurons to the removal of favored or non-favored food in *npr-19* mutants. Each trace is average normalized fluorescence change ( $\Delta F/F$ ) versus time. Favored food (blue), DA1877, OD 1; non-favored food (orange), DA1885, OD 1. **C.** Summary of the data in **B**,

showing mean peak  $\Delta F/F$ . For statistics in **A-C**, see Supp. Table 3. Symbols: \*,  $p < 0.05$ ; \*\*,  $p < 0.01$ ; n.s., not significant. Error bars and shading, 95% confidence interval.

309

310 The forgoing results suggest a model of hedonic feeding in *C. elegans* in which activation of the  
311 NPR-19 receptor by AEA triggers a bidirectional change in AWC's food sensitivity (Fig. 2C, D)  
312 to induce the appetitive component of hedonic feeding. We therefore tested whether *npr-19* is

313 required for AEA's effects on AWC. The effect of AEA on AWC's response to food was  
314 abolished in *npr-19* mutants (Fig. 3B, C, Suppl. Table 3, line 30, 33-34, 39, 42-43). This  
315 phenotype was partially rescued by over-expression of the CB1 receptor (Suppl. Fig. 4A, B,  
316 Suppl. Table 5, line 12, 15, 18, 22, 24). We conclude that the appetitive component of AEA-  
317 induced hedonic feeding requires both the NPR-19 receptor and AWC neurons.

318  
319 In perhaps the simplest model of AEA's effect on AWC, NPR-19 is expressed in AWC, and  
320 activation of NPR-19 produces the observed bidirectional modulation of sensitivity to favored  
321 and non-favored food. To test this model, we characterized the *npr-19* expression pattern. This  
322 was done by expressing a *pnpr-19::GFP* transgene together with either *pcho-1::mCherry* or *peat-*  
323 *4::mCherry*, two neuronal markers whose expression pattern has been thoroughly characterized  
324 (Pereira et al., 2015; Serrano-Saiz et al., 2013). We observed expression of *npr-19* in body wall  
325 muscles together with an average of 29 neuronal somata in the head and 8 in the tail (Fig. 4A,  
326 Suppl. Table 6). Using positional cues in addition to the markers, we identified 28 of the GFP-  
327 positive somata, which fell into 15 neuron classes (Table 1). These classes could be organized  
328 into four functional groups: sensory neurons (URX, ASG, AWA, and PHC), interneurons (RIA,  
329 RIM, and LUA), motor neurons (URA and PDA), and pharyngeal neurons (M1, M3, MI, MC,  
330 I2, and I4). Although AWC could be identified in every worm by its characteristic position in the  
331 *peat-4::mCherry* expressing strain, GFP expression was never observed in this neuron class. Our  
332 expression data, together with the absence of significant *npr-19* expression in AWC in RNA  
333 sequencing experiments based on the *C. elegans* Neuronal Gene Expression Map & Network  
334 (CeNGEN) consortium (Hammarlund et al., 2018), suggests that AWC does not express *npr-19*.  
335 These findings are inconsistent with a direct action of AEA on AWC neurons mediated by the  
336 NPR-19 receptor.

| Function    | Identity of <i>npr-19</i> ::GFP+ neurons | <i>eat-4</i> ::mCherry expression | <i>cho-1</i> ::mCherry expression | Cell body position and morphology | CeNGen <i>npr-19</i> expression | Transmitters                           | <i>unc-31</i> expression |
|-------------|------------------------------------------|-----------------------------------|-----------------------------------|-----------------------------------|---------------------------------|----------------------------------------|--------------------------|
| Pharyngeal  | M3 L/R                                   | *                                 |                                   |                                   |                                 | Glu, FLP-18, NLP-3                     |                          |
|             | MI                                       | *                                 |                                   |                                   | *                               | Glu                                    | *                        |
|             | MCL/R                                    |                                   |                                   | *                                 | *                               | Ach, FLP-21                            | *                        |
|             | I2 L/R                                   | *                                 |                                   |                                   |                                 | Glu, NLP-3, NLP-8                      | *                        |
|             | I4                                       |                                   |                                   | *                                 | *                               | NLP-3, NLP-13                          | *                        |
|             | M1                                       |                                   | *                                 | *                                 | *                               | Ach, NLP-3                             | *                        |
| Sensory     | PHC L/R                                  | *                                 |                                   |                                   | *                               | Glu                                    |                          |
|             | URX L/R                                  |                                   | *                                 |                                   | *                               | Ach, FLP-8, FLP-10, FLP-11, FLP-19     | *                        |
|             | ASG L/R                                  | *                                 |                                   |                                   | *                               | Glu, 5HT, FLP-6, FLP-13, FLP-22, INS-1 | *                        |
|             | AWA L/R                                  |                                   |                                   | *                                 | *                               | INS-1                                  | *                        |
| Interneuron | RIA L/R                                  | *                                 |                                   |                                   |                                 | Glu                                    | *                        |
|             | RIM L/R                                  | *                                 |                                   |                                   | *                               | Glu, Tyr                               |                          |
|             | LUA L/R                                  | *                                 |                                   |                                   | *                               | Glu, NLP-13, PDF-1                     |                          |
| Motor       | URA D/V L/R                              |                                   | *                                 |                                   | *                               | ACh                                    | *                        |
|             | PDA                                      |                                   | *                                 |                                   | *                               | ACh                                    | *                        |

**Table 1. *npr-19*-expressing neurons.** The *npr-19* expression pattern was characterized by expressing a *pnpr-19*::GFP transgene together with either *pcho-1*::mCherry or *peat-4*::mCherry, respectively labeling previously identified cholinergic and glutamatergic neurons (Pereira et al., 2015; Serrano-Saiz et al., 2013). GFP-positive neurons that expressed neither of the markers were identified by position and morphology, and confirmed by cross-reference to CeNGEN expression data showing *npr-19*. Also shown are neurotransmitter identity (Loer and Rand, 2016; Altun, 2011) and *unc-31* expression (CeNGEN) of each identified neuron class. See also Supp. Table 6.

337

338 The *npr-19* expression pattern supports at least two indirect models of AEA's effect on AWC. In  
 339 the first model, AWC inherits its sensitivity to AEA from incoming, AEA-sensitive, classical  
 340 synaptic pathways (i.e., those that do not involve neuromodulatory transmitters). For example, in  
 341 one common endocannabinoid signaling motif, endocannabinoids act as retrograde signals  
 342 released by a postsynaptic neuron to suppress transmitter release by binding to cannabinoid  
 343 receptors on presynaptic terminals. This motif could render AWC-related synaptic pathways  
 344 sensitive to AEA. To determine whether this motif may be present in *C. elegans*, we searched the  
 345 *C. elegans* connectome for the anatomical substrate of retrograde signaling: synaptically coupled  
 346 pairs of neurons in which the *presynaptic* neuron expressed *npr-19* and the *postsynaptic* neuron  
 347 expressed a key synthesis enzyme for AEA. The set of presynaptic, *npr-19*-expressing neurons  
 348 was limited to the six non-pharyngeal neuron classes in the head, where AWC is located (ASG,  
 349 AWA, RIA, RIM, URA, URX). We found that these six classes are presynaptic to 42 different  
 350 *nape-1,2*-expressing neurons. Approximately half of these neurons receive synaptic input from

351 more than one *npr-19* expressing neuron such that there are 74 coupled pairs fitting the necessary  
352 (but not sufficient) anatomical and gene-expression criteria for retrograde AEA signaling. In 14  
353 of these coupled pairs, the postsynaptic neuron is directly presynaptic to AWC, opening the  
354 possibility that AWC inherits its AEA sensitivity synaptically.

355

356 To test whether classical synaptic pathways render AWC sensitive to AEA, we imaged AWC  
357 activity in worms with a null mutation in *unc-13*, the *C. elegans* homolog of Munc13, which is  
358 required for exocytosis of the clear-core synaptic vesicles that contain classical neurotransmitters  
359 (Richmond et al., 1999). We found that AEA's effect on food sensitivity in *unc-13* mutants was  
360 essentially the same as in wild type worms (Fig. 4B, C; Suppl. Table 4, line 3, 6-7, 9, 13, 15-16,  
361 18). This result makes it unlikely that AWC inherits its AEA sensitivity from synaptic pathways  
362 that involve classical neurotransmitters.

363

364 In the second indirect model of AEA's effect on AWC, AEA causes the release of  
365 neuromodulators that act on AWC. Most neuromodulatory substances, such as neuropeptides and  
366 biogenic amines, are released by exocytosis of dense-core vesicles (Devine & Simpson, 1968;  
367 Probert et al., 1983). In mammals, presynaptic terminals that both contain dense-core vesicles  
368 and are immunoreactive for the cannabinoid receptor CB1 are a recurring synaptic motif in  
369 several brain regions including the CA1 and CA3 of the hippocampus, prefrontal cortex, and  
370 basolateral amygdala (Fitzgerald et al., 2019; Takács et al., 2014). To determine whether this  
371 motif may be present in *C. elegans*, we used gene expression data (Hammarlund et al., 2018) to  
372 search for *npr-19*-expressing neurons that also express *unc-31*, the *C. elegans* ortholog of human  
373 CADPS/CAPS, which is required for calcium-regulated dense-core vesicle fusion (Speese et al.,  
374 2007). We found that most of the *npr-19*-expressing neurons identified in our study (11 out of  
375 15, Table 1) also express *unc-31*. This result indicates that the anatomical substrate for  
376 cannabinoid-mediated release of neuromodulators exists in *C. elegans*.

377

378 To test this version of the indirect model, we recorded from AWC in an *unc-31* deletion mutant.  
379 If AEA's effect on AWC were solely the result of neuromodulation mediated by *unc-31*, one  
380 would expect this mutation to phenocopy *npr-19* null: exhibiting no AEA effects on AWC  
381 responses. This appeared to be the case for the response to favored food, in which there was no

382 effect of AEA (Fig. 4D, E; Suppl. Table 4, line 21, 24-25, 27). AWC responses to non-favored  
 383 food were still modulated by AEA (Fig. 4D, E; Suppl. Table 4, line 31, 33, 36), but they were  
 384 increased rather than decreased. The fact that AEA's modulation of AWC food sensitivity is  
 385 severely disrupted in *unc-31* mutants supports a model in which NPR-19 receptors activated by  
 386 AEA promote the release of dense-core vesicles containing modulatory substances that act on  
 387 AWC.

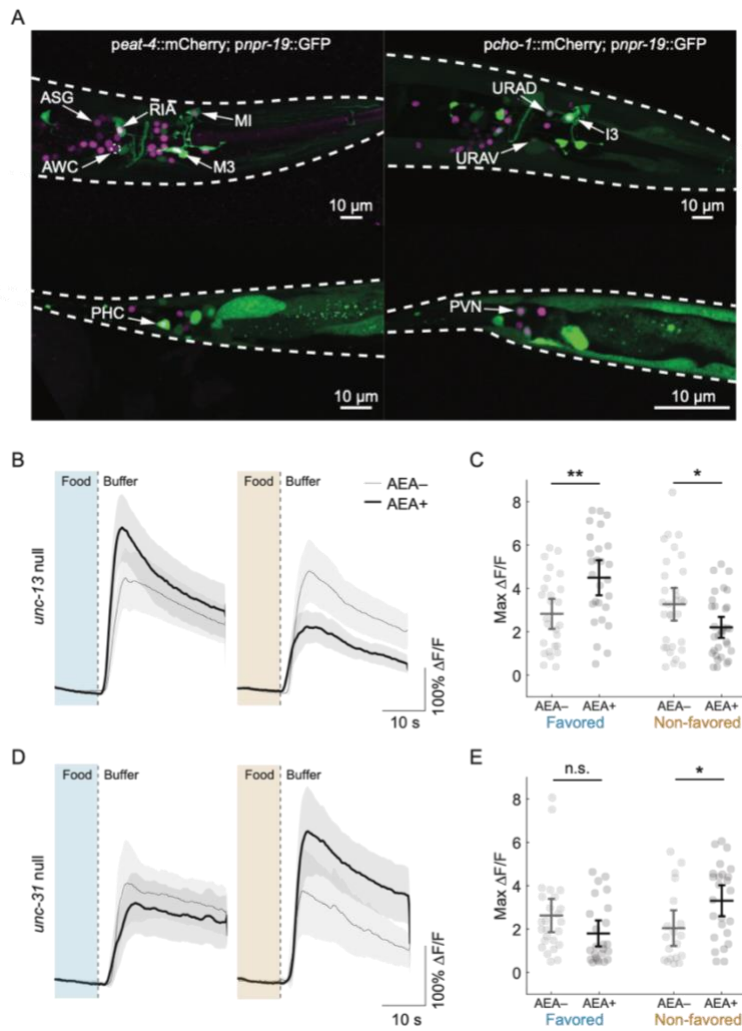

**Fig 4. Genetic pathways underlying AEA-mediated AWC modulation.** **A.** Expression pattern of *npr-19*. Green cells express *npr-19*. *Left*, magenta indicates expression of *eat-4*, a marker for glutamatergic neurons. *Dashed circle*, the soma of AWC, which is glutamatergic. *Right*, magenta indicates expression of *cho-1*, a marker for cholinergic neurons. *Top*, *bottom*, head and tail expression, respectively. **B.** Effect of AEA on the response of AWC neurons to the removal of favored or non-favored food in *unc-13* mutants. Each trace is average normalized fluorescence change ( $\Delta F/F$ ) versus time. Favored food (blue), DA1877, OD 1; non-favored food (orange), DA1885, OD 1. **C.** Summary of the data in **B**, showing mean peak  $\Delta F/F$ . **D.** Effect of AEA on the response of AWC neurons to the removal of favored or non-favored food in *unc-31* mutants. Each trace is average normalized fluorescence change ( $\Delta F/F$ ) versus time. Favored food (blue), DA1877, OD 1; non-favored food (orange), DA1885, OD 1. **E.** Summary of the data in **D**, showing mean peak  $\Delta F/F$ . For statistics in **B-E**, see Suppl. Table 4. Symbols: \*,  $p < 0.05$ ; \*\*,  $p < 0.01$ ; n.s., not significant. Error bars and shading, 95% confidence interval.

388

## 389 Discussion

390 In mammals, administration of THC or endocannabinoids induces hedonic feeding, meaning an  
 391 increase in consumption of calorically dense, palatable foods. The present study provides two  
 392 converging lines of evidence in support of the hypothesis that cannabinoids induce hedonic



393 feeding in *C. elegans*. First, AEA can differentially alter accumulation in favored and non-  
394 favored food, causing a larger proportion of worms to accumulate in the former and a smaller  
395 proportion in the latter (Fig. 1G). Individual worms tend to exit, explore, and re-enter food  
396 patches multiple times over the time scale of our experiments (Shtonda, 2006). Thus, these  
397 proportions are mathematically equivalent to the average fraction of time that an individual  
398 worm spends feeding on each type of food. Furthermore, worms given an inexhaustible supply of  
399 food, feed at a constant rate for at least six hours (Izquierdo et al., 2021), far longer than  
400 observation times in this study. Combining these two observations, we can infer that for *C.*  
401 *elegans*, differential accumulation results in differential consumption. Second, AEA  
402 differentially alters feeding rate, causing worms to feed at a higher rate in preferred food and a  
403 lower rate in non-preferred food (Fig. 1I). Thus, the effect of AEA on feeding rate amplifies its  
404 effect on fraction of time feeding in favored and non-favored food patches. The result of this  
405 amplification is increased consumption of favored food in a manner consistent with hedonic  
406 feeding. We conclude that hedonic feeding is conserved in *C. elegans*.

407  
408 Our findings confirm and extend previous investigations concerning the role of the  
409 endocannabinoid system in regulating feeding in *C. elegans*. The endocannabinoids AEA and 2-  
410 AG were previously shown to reduce pumping frequency in animals feeding on nutritionally  
411 inferior food (Oakes et al., 2017). We now show that this reduction is part of a broader pattern in  
412 which pumping rate on superior food increases and pumping on inferior food decreases.  
413 Additionally, we have confirmed that *npr-19* is expressed in a limited number of neurons  
414 including the inhibitory pharyngeal motor neuron M3 and the sensory neuron URX. We extend  
415 these results by identification of 13 additional *npr-19* expressing neurons including sensory  
416 neurons, interneurons, and motor neurons. Of particular interest is the detection of *npr-19*  
417 expression in five additional pharyngeal neurons. Thus, 6 of the 20 neurons comprising the  
418 pharyngeal nervous system are potential sites for endocannabinoid mediated regulation of  
419 pumping rate. It is notable that these six neurons include the motor neuron MC, which is  
420 hypothesized to act as the pacemaker neuron for rhythmic pharyngeal contractions (Avery &  
421 Horvitz, 1989; D M Raizen et al., 1995), and M3, which regulates pump duration (Avery, 1993).  
422 It will now be important to tackle the question of how pumping rate is modulated in indifferent  
423 directions for favored and non-favored foods.

424

425 To date, only a small number of studies have examined the effects of cannabinoids on feeding  
426 and food preference in invertebrates. Early in evolution, the predominant effect may have been  
427 feeding inhibition. Cannabinoid exposure shortens bouts of feeding in Hydra (De Petrocellis et  
428 al., 1999). Larvae of the tobacco hornworm moth *Manduca sexta* prefer to eat leaves containing  
429 lower rather than higher concentrations of the phytocannabinoid cannabidiol (Park et al., 2019).  
430 In adult fruit flies (*Drosophila melanogaster*), pre-exposure to phyto- or endocannabinoids (AEA  
431 and 2-AG) for several days before testing reduces consumption of standard food. On the other  
432 hand, in side-by-side tests of sugar-yeast solutions with and without added phyto- or  
433 endocannabinoids, adult fruit flies prefer the cannabinoid-spiked option. The picture that  
434 emerges from these studies is that whereas the original response to cannabinoids may have been  
435 feeding suppression, through evolution the opposite effect arose, sometimes in the same  
436 organism. As we have shown, *C. elegans* exhibits both increases and decreases in feeding  
437 responses under the influence of cannabinoids and does so in a manner that would seem to  
438 improve the efficiency of energy homeostasis by promoting consumption of nutritionally  
439 superior food and depressing consumption of nutritionally inferior food. At present there is no  
440 evidence in mammals for bidirectional modulation of consumption, but our results, together with  
441 the logic of homeostasis, predict that such an effect may exist under certain conditions.

442

443 Although administration of cannabinoids causes hedonic feeding in *C. elegans* and mammals,  
444 there are notable differences in how it is expressed. One experimental design commonly used in  
445 mammalian studies is to measure consumption of a single test food, which is either standard lab  
446 food or a more palatable food. In such experiments, consumption of both food types is increased  
447 (Williams et al., 1998; Williams & Kirkham, 1999). The analogous experiment in the present  
448 study is the experiment of Fig. 1I, in which consumption (inferred from pumping rate) was  
449 measured in response to either favored or non-favored food. We found that consumption of  
450 favored food increases as in mammalian studies whereas, in contrast, consumption of non-  
451 favored food decreases. A second experimental design commonly used in mammalian studies is  
452 to measure consumption of standard and palatable foods when the two foods are presented  
453 together. In this type of experiment, cannabinoids increase consumption of palatable food, but  
454 consumption of standard food is unchanged (Brown et al., 1977; Deshmukh & Sharma, 2012;

455 Escartín-Pérez et al., 2009b; Koch & Matthews, 2001; Shinohara et al., 2009). Cannabinoid  
456 receptor antagonists produce the complementary effect: reduced consumption of palatable food  
457 with little or no change in consumption of standard food. The analogous experiments in the  
458 present study are the T-maze assays in which maze arms are baited with favored and non-favored  
459 food. We find that following cannabinoid administration, consumption of favor food increases  
460 whereas consumption of non-favored food decreases.

461  
462 Thus, considering both experimental designs, the effects of cannabinoid exposure on  
463 consumption in *C. elegans* are bidirectional, whereas in mammals they are not. It is conceivable  
464 that a bidirectional response is advantageous in that it produces a stronger bias in favor of  
465 superior food than a unidirectional response, raising the question of why bidirectional responses  
466 have not been reported in mammals. There are, of course, considerable differences in the feeding  
467 ecology of nematodes and mammals; perhaps mammals evolved under a different set of  
468 constraints under which unidirectional responses are the better strategy. On the other hand,  
469 differences in experimental procedures may explain the absence of bidirectional responses. For  
470 example, in mammalian studies in which the two foods are presented together, standard and  
471 palatable foods are placed in close proximity within a small cage, with the result that there is  
472 essentially no cost in terms of physical effort for the animal to switch from one feeding location  
473 to the other. It is conceivable that increasing the switching cost (Salamone et al., 1994) could  
474 lead to a differential effect on consumption in mammals.

475  
476 We propose the following model of differential accumulation on food leading to hedonic feeding  
477 in *C. elegans*. The model focusses on the olfactory neuron AWC, which is necessary and  
478 sufficient for navigation to the source of food-related odors (Kocabas et al., 2012) and exhibits  
479 bidirectional modulation by AEA. Calcium imaging shows that AWC is activated by food  
480 removal, regardless of whether favored or non-favored food is removed (Fig. 2C)(Chalasani et  
481 al., 2007). Previous studies have demonstrated that exogenous activation of AWC triggers two  
482 previously described behavioral motifs known to contribute to locomotion oriented toward  
483 attractive odors. First, its activation truncates bends of the head and neck that occur during the  
484 worm's normal sinusoidal locomotion (Kocabas et al., 2012). This means that each time a body  
485 bend moves the head away from an odor source, AWC will activate, and this bend will be

486 truncated. Over time, successive truncations of bends in the wrong direction steer the animal in  
487 the right direction: toward the odor source; this widely conserved behavioral motif is known as  
488 *klinotaxis* (Fraenkel & Gunn, 1961). Second, activation of AWC causes the animal to stop  
489 moving forward, reverse, and resume locomotion in a new direction that is better aligned with  
490 the food odor source (Gordus et al., 2015; Gray et al., 2005); this behavioral motif is known as a  
491 *pirouette* (Pierce-Shimomura et al., 1999). Both motifs not only promote navigation toward a  
492 patch of food, but also promote retention in a patch. For example, a pirouette initiated when the  
493 worm's head protrudes beyond the food-patch boundary will return the worm into the patch. We  
494 find that AEA exposure increases AWC's response to the removal of favored food (Fig. 2C). In  
495 the proposed model, this effect both accentuates klinotaxis and increases the probability of  
496 pirouettes caused by locomotion away from the odor source. The net result is enhanced approach  
497 to, and retention in, patches of favored food. Conversely, we also find that AEA exposure  
498 decreases responses to removal of non-favored food. This effect weakens klinotaxis and  
499 decreases pirouette probability, resulting in diminished approach and retention in non-favored  
500 food. The result of these two processes is increased or decreased accumulation, respectively, in  
501 patches of favored and non-favored food.

502

503 The requirement for *ceh-36* in rendering *C. elegans* food preferences sensitive to AEA (Fig. 2B)  
504 suggests that AWC neurons provide a necessary link between AEA and hedonic feeding.  
505 However, this experiment does not have statistical power sufficient to rule out contributions from  
506 other chemosensory neurons. Of particular interest are two chemosensory neurons AWA and  
507 ASG, both of which express *npr-19* (Table 1) and are required for chemotaxis (Bargmann et al.,  
508 1993; Bargmann & Horvitz, 1991). It will now be important to map cannabinoid sensitivity  
509 across the entire population or food-sensitive odors to understand how cannabinoids alter the  
510 overall chemosensory representation of favored and non-favored foods.

511

512 Cannabinoids have been observed to modify chemosensitivity at several levels in mammals.  
513 Both AEA and 2-AG amplify the response of primary chemosensory cells, such as the sweet-  
514 taste cells in the tongue (Yoshida et al., 2010, 2013), which may help to explain increased  
515 consumption of sweet foods and liquids. Cannabinoids can also increase the sensitivity of the  
516 mammalian olfactory system as measured during food-odor exploration (Heinbockel & Straiker,

517 2021; Nogi et al., 2020; Soria-Gómez et al., 2014). We observed an analogous effect in *C.*  
518 *elegans*, in that AEA alters the sensitivity of a primary chemosensory neuron, AWC. In  
519 unexposed worms, AWC is equally sensitive to favored and non-favored food, suggesting it  
520 cannot detect a difference in the odors released by the two food types. However, in remarkable  
521 alignment with the observed bidirectional changes in food preference in worms exposed to AEA,  
522 this neuron becomes more sensitive to favored food and less sensitive to non-favored food,  
523 therefore acquiring the ability to discriminate between the odors of these foods.

524

525 AEA's effect on AWC appears to be indirect. Our results are consistent with a model in which  
526 AEA activates NPR-19 receptors to promote release of dense-core vesicles containing  
527 neuromodulators that act on AWC. This model is supported by evidence in *C. elegans* that 2-AG,  
528 which is capable of activating NPR-19, stimulates widespread release of serotonin (Oakes et al.,  
529 2017, 2019); thus, NPR-19 activation seems capable of promoting dense-core vesicle release.  
530 Additionally, AWC expresses receptors for biogenic amines, and it responds to neuropeptides  
531 released by neighboring neurons (Chalasani et al., 2010; Leinwand & Chalasani, 2013),  
532 suggesting that it has postsynaptic mechanisms for responding to neuromodulation. Identification  
533 of one or more neuromodulators responsible for AEA's effect on AWC, together with their  
534 associated receptors, will be an important step in answering the question of how AEA causes  
535 differential changes in food-odor sensitivity.

536

537 Our results establish a new role for endocannabinoids in *C. elegans*: the induction of hedonic  
538 feeding. There is general agreement that the endocannabinoid system and its molecular  
539 constituents offer significant prospects for pharmacological management of health, including  
540 eating disorders and substance abuse (Parsons & Hurd, 2015). Clear parallels between the  
541 behavioral, neuronal, and genetic basis of hedonic feeding in *C. elegans* and mammals establish  
542 the utility of this organism as a new genetic model for the investigation of molecular and cellular  
543 basis of these and related disorders.

544

## 545 **Materials and Methods**

546 **Strains.** Animals were cultivated under standard conditions (Brenner, 1974) using *E. coli* OP50  
547 as a food source. Young adults of the following strains were used in all experiments:

| Experiment                       | Strain      | Genotype                                                                                                        |
|----------------------------------|-------------|-----------------------------------------------------------------------------------------------------------------|
| Reference strain                 | N2, Bristol | Wild type                                                                                                       |
| Preference and feeding assays    | FK311       | <i>ceh-36(ks86)</i>                                                                                             |
|                                  | RB1668      | <i>npr-19(ok2068)</i>                                                                                           |
|                                  | XL324       | <i>ntIS1701[npr-19::CNR1::gfp-npr-19(1.1);unc-122::RFP]</i>                                                     |
|                                  | XL325       | <i>ntIS1702[npr-19::npr-19::gfp-npr-19(1.1)]</i>                                                                |
| Calcium imaging                  | XL322       | <i>ntIS1703[<i>str-2</i>::GCaMP6::wCherry;<i>unc-122</i>::dsRed]</i>                                            |
|                                  | XL327       | <i>unc-13(e51);ntIS1703[<i>str-2</i>::GCaMP6::wCherry;<i>unc-122</i>::dsRed]</i>                                |
|                                  | XL326       | <i>unc-31(e928);ntIS1703[<i>str-2</i>::GCaMP6::wCherry;<i>unc-122</i>::dsRed]</i>                               |
|                                  | XL346       | <i>npr-19(ok2068);ntIS1912[<i>str-2</i>::GCaMP6::wCherry;<i>unc-122</i>::dsRed]</i>                             |
| <i>npr-19</i> expression pattern | XL334       | <i>otIS544[<i>cho-1</i>::SL2::mCherry::H2B+<i>pha-1</i>(+);ntIS19114[npr-19::GFP1.1;<i>unc-122</i>::dsred]</i>  |
|                                  | XL335       | <i>ntIS19114[npr-19::GFP1.1;<i>unc-122</i>::dsred];otIS518[<i>eat-4</i>::SL2::mCherry::H2B+<i>pha-1</i>(+)]</i> |

548

549 **Bacteria.** The following streptomycin-resistant bacterial strains were used in this study: DA1885

550 (*Bacillus simplex*), DA1877 (*Comamonas* sp.), *E. Coli* HB101, and *E. Coli* DA837. Bacteria

551 were grown overnight at 37°C in presence of 50 mg/ml streptomycin, concentrated by

552 centrifugation, rinsed three times with either M9 medium (for EPG experiments) or A0 buffer

553 (for behavioral/imaging experiments; MgSO<sub>4</sub> 1 mM, CaCl<sub>2</sub> 1 mM, HEPES 10 mM, glycerol to

554 350 mOsm, pH 7), and resuspended to their final concentration. Concentration was defined as

555 optical density at 600 nm (OD<sub>600</sub>), as measured with a DSM cell density meter (Laxco, Bothell,

556 WA, USA). All measurements were performed on samples diluted into the linear range of the

557 instrument (OD 0.1-1). Previous experiments determined that OD<sub>600</sub> = 1 corresponds to

558 approximately 2.35 × 10<sup>9</sup> and 2.00 × 10<sup>9</sup> colony forming units/mL of *Comamonas* and *Simplex*,

559 respectively (Katzen *et al.*, 2021).

560

561 **Animal preparation.** Worms were washed five times in M9 for EPG experiments or A0 buffer

562 (see above) for behavioral/imaging experiments. Worms were then incubated for 20 minutes

563 with either background solution alone or background solution + 300 μM (electropharyngeogram

564 experiments) or 100 μM (behavioral assays and calcium imaging experiments)

565 Arachidonoyl ethanolamide (AEA, Cayman chemical, Ann Arbor, MI, USA). The incubation

566 time and relatively high concentration reflects the low permeability of the *C. elegans* cuticle to  
567 exogenous molecules (Rand & Johnson, 1995; Sandhu et al., 2021).

568

569 **Behavioral assays.** Freshly poured NGM agar plates were dried in a dehydrator for 45 minutes  
570 at 45°C. A maze cut from foam sheets (Darice, Strongsville, OH, USA) using a laser cutter was  
571 placed on each plate (Fig. 1A). Maze arms were seeded with 4.5 µl of bacteria. Animals were  
572 deposited at the starting point of the maze by liquid transfer and a transparent plastic disc was  
573 placed over the maze to eliminate air currents; 12 plates were placed on a flatbed scanner and  
574 simultaneously imaged every 15 minutes (Mathew et al., 2012; Stroustrup et al., 2013). The  
575 number of worms in the two patches of food and the region between them was counted manually  
576 and a preference index  $I$  calculated as:  $I = (n_F - n_{NF}) / (n_F + n_{NF})$ , where  $n_F$  is the number of  
577 worms in the favored food patch, and  $n_{NF}$  is the number of worms in the non-favored food patch.  
578 Worms that did not leave the starting point were excluded. For experiments involving mutants, a  
579 cohort of N2 animals was run in parallel on the same day. Data from statistically  
580 indistinguishable N2 cohorts were pooled where possible. In some experiments, a paralytic agent  
581 (sodium azide, NaN<sub>3</sub>, 3 µl at 20 mM), was added to each food patch to prevent animals from  
582 leaving the patch of food after reaching it. Sodium azide diffuses through the agar over time and  
583 its action is not instantaneous. These two characteristics resulted in some worms becoming  
584 paralyzed around rather than in the patch of food, as they stop short of the patch or escape the  
585 patch briefly before becoming paralyzed. To account for these effects all worms within 5mm of  
586 the end of the maze's arm, rather than on food, were used when calculating preference index.

587

588 **Electropharyngeograms.** Pharyngeal pumping was measured electrophysiologically (Lockery  
589 et al., 2012) using a ScreenChip microfluidic system (InVivo Biosystems, Eugene, OR, USA).  
590 Briefly, following pre-incubation as described above, worms were loaded into the worm  
591 reservoir of the microfluidic device which was pre-filled with bacterial food (OD<sub>600</sub> = 0.8) ± AEA  
592 300 µM; this food density was chosen to reduce possible ceiling effects on pumping rate  
593 modulation by AEA. To record voltage transients associated with pharyngeal pumping (David  
594 M. Raizen & Avery, 1994)., worms were transferred on at a time from the reservoir to the  
595 recording channel of the device such that the worm was positioned between a pair of electrodes  
596 connected to a differential amplifier. Worms were given three minutes to acclimate to the

597 channel before and recorded for one minute. Mean pumping frequency was extracted using  
598 custom code written in Igor Pro (Wavemetrics, Lake Oswego, OR, USA).

599

600 **Calcium imaging.** After pre-incubation with buffer or buffer +AEA (see: animal preparation),  
601 worms were immobilized in a custom microfluidic chip and presented with alternating 30-second  
602 epochs of buffer and bacteria (either *B. Simplex* or *Comamonas sp.* at OD<sub>600</sub> 1, at a flow rate of  
603 100 µl/min) for 3 minutes. Optical recordings of GCaMP6-expressing AWC neurons were  
604 performed on a Zeiss Axiovert 135, using a Zeiss Plan-Apochromat 40× oil, 1.4 NA objective, a  
605 X-Cite 120Q illuminator, a 470/40 excitation filter, and a 560/40 emission filter. Neurons were  
606 imaged at 3-10 Hz on an ORCA-ERA camera (Hamamatsu). Images were analyzed using custom  
607 code written in MATLAB: the change in fluorescence in a hand-drawn region of interest that  
608 contained only the soma and neurite. Data were normalized to the average fluorescence  
609  $F_0$  computed over the 15 second interval before the first food stimulus. We computed normalized  
610 fluorescence change as  $\Delta F(t)/F_0$ , where  $\Delta F(t) = F(t) - F_0$ ; following convention, we refer to  
611 this measure as “ $\Delta F/F$ .” For comparison of treatment groups, we used the peak amplitude of  
612 post-stimulus  $\Delta F/F$ . In some animals, AWC appeared not to respond to the food stimulus,  
613 regardless of treatment group. To classify particular AWC neurons as responsive or non-  
614 responsive, we obtained the distribution of peak  $\Delta F/F$  values in control experiments in which  
615 the stimulus channel contained no food; responsive neurons were defined as those whose peak  
616  $\Delta F/F$  value exceeded the 90<sup>th</sup> percentile of this distribution. Critically, the percentage of non-  
617 responders did not vary between AEA-treated animals and (25.46% vs 22.49% respectively;  
618  $\chi^2(1,759) = 0.699, p = 0.4031$ ).

619

620 **Expression profile for *npr-19*.** Worms were immobilized with 10 mM sodium azide (NaN<sub>3</sub>) and  
621 mounted on 5% agarose pads formed on glass slides. Image stacks (30-80 images) were acquired  
622 using a Zeiss confocal microscope (LSM800, ZEN software) at 40X magnification.

623 Identification of neurons was done based on published expression profiles of the *pcho-*  
624 *1::mCherry* (Pereira et al., 2015) and *peat-4::mCherry* (Serrano-Saiz et al., 2013) transgenes in  
625 *C. elegans*. Individual neurons were identified by mCherry expression and the relative positions  
626 of their cell bodies; *npr-19* expression was visualized using a *pnpr-19::GFP* transgene. Co-  
627 expression of GFP and mCherry was assessed by visual inspection using 3D image analysis



628 software Imaris (Oxford Instruments). Representative images (Fig. 4A) are maximum intensity  
629 projections of 30-80 frames computed using ImageJ software (Collins, 2007). Expression of the  
630 NPR-19 receptor was widespread in body wall muscles, but restricted to 29 neurons in the head  
631 (27 - 31, 95% confidence interval,  $n = 20$  worms imaged) and 8 neurons in the tail (7.8 - 8.5,  
632 95% confidence interval,  $n = 22$  worms imaged) (Suppl. Table 6). Overall, 28 of the *npr-19*-  
633 expressing neurons co-localized with either *cho-1* or *eat-4*, whereas ~9 did not co-localize with  
634 either marker. The identity of the latter cells was ascertained based on cell body position and  
635 morphology, and verified by *npr-19* expression (threshold = 2) as reported in the *C. elegans*  
636 Neuronal Gene Expression Map & Network (CeNGEN) consortium database (Hammarlund et  
637 al., 2018).

638

639 **Statistics.** A detailed description of statistical tests used, their results, and their interpretation is  
640 presented in Supplemental Tables 1-5. Data were checked for normality with a Kolmogorov-  
641 Smirnov test.

642

643 *Number of replicates.* The minimal sample size for the T-maze assays were based on pilot  
644 experiments which showed an acceptable effect size with ~10 replicates per experimental  
645 condition. Similarly, the minimal number of replicates for EPG experiments and imaging  
646 experiments were based on previously published data in which mutants/treatments could be  
647 distinguished with ~10 replicates.

648

649 *Effect sizes.* Effect sizes were computed as follow: Cohen's  $d$  for  $t$ -tests, partial eta-squared for  
650 ANOVAs, and  $|z|/\sqrt{n}$  for Mann-Whitney test, where  $z$  is the  $z$ -score and  $n$  is the number of  
651 observations.

652

653 *Behavioral experiments (T-mazes).* Preference indices were analyzed using a two-factor  
654 ANOVA with repeated measures (effect of AEA  $\times$  effect of time, with time as a repeated  
655 measure). For easier presentation, an average index across the four time-points was calculated  
656 and displayed (Fig. 1C-F, 2B, 3A). All time series are nonetheless available for inspection in Fig.  
657 1A, 2A and Supplemental Fig. 1 and 2. The effect of AEA was deemed significant if main effect  
658 of AEA was significant in the ANOVA. Averaging the four time points in a series would only be

659 problematic if there was a non-ordinal interaction  $AEA \times \text{time}$ . Inspection of ANOVA results  
660 and time series reveal that the only  $AEA \times \text{time}$  interaction in Fig. 1E is ordinal and minimal. In  
661 cases where the effect of time was important (Fig. 2A) or the interaction  $AEA \times \text{time}$  was  
662 meaningful (Fig. 1G) the time series of preference indices was presented. The comparison of  
663 preference indices between N2 and mutants relied on a two-factor ANOVA (effect of strain  $\times$   
664 effect of AEA). The average preference index across the four time-points was used for the  
665 comparison. In addition to an ANOVA, planned comparisons were incorporated in the  
666 experimental design using t-tests and focusing on four scientifically relevant contrasts: (1)  
667 mutants,  $AEA^-$  vs  $AEA^+$ ; (2) N2,  $AEA^-$  vs  $AEA^+$ ; (3)  $AEA^-$ , mutants vs N2; (4)  $AEA^+$ ,  
668 mutants vs N2.

669  
670 *Electropharyngeograms.* As the data were not normally distributed in most of the cohorts, a non-  
671 parametric test (Mann-Whitney) was used to compared pumping frequencies between  
672 strains/treatments.

673  
674 *Calcium imaging.* Peak  $\Delta F/F$  was used as the primary measure. A two-factor ANOVA (effect of  
675  $AEA \times$  effect of bacteria type) was used to assess the effect of AEA on AWC responses. Planned  
676 t-tests were focused on four contrasts: (1) favored food,  $AEA^-$  vs  $AEA^+$ ; (2) non-favored food,  
677  $AEA^-$  vs  $AEA^+$ ; (3)  $AEA^-$ , favored food vs non-favored food; (4)  $AEA^+$ , favored food vs non-  
678 favored food. For comparisons between N2 and mutants, a two-factor ANOVAs (effect of AEA  
679  $\times$  effect of strain) was performed for each of the bacteria type (favored and non-favored) and  
680 followed by four contrasts (t-tests): (1) mutants,  $AEA^-$  vs  $AEA^+$ ; (2) N2,  $AEA^-$  vs  $AEA^+$ ; (3)  
681  $AEA^-$ , mutants vs N2; (4)  $AEA^+$ , mutants vs N2.

682  
683 *Multiple comparisons.* No correction for multiple comparisons was applied in *t*-tests used in pair-  
684 wise comparisons of means in multifactor experiments as the experimental design in this study  
685 relied on a small number (3 per condition) of planned (a priori), rather than unplanned (a  
686 posteriori), scientifically relevant contrasts (Keppel & Zedeck, 1989).

687  
688  
689

690 **Acknowledgements**

691 We thank Richard Komuniecki for the *npr-19*-null and rescue worm strains. The *unc-13*, *unc-31*,  
692 *ceh-36*, *cho-1*, and *eat-4* worm strains were provided by the CGC, which is funded by NIH  
693 Office of Research Infrastructure Programs (P40 OD010440). We also would like to thank  
694 Oliver Hobert, Jonathan Millet, and Jon Pierce for thoughtful discussion of the project. We thank  
695 Chris Doe for use of his Zeiss LSM800 confocal microscope for imaging. Finally, we would like  
696 to thank Kathy Chicas-Cruz for constructing our calcium imaging strains. Funding for this  
697 project was provided by NIDA (DA047645) and NIGM (GM129576).

698

699 **Competing interests**

700 Shawn R. Lockery is co-founder and Chief Technology Officer of InVivo Biosystems, Inc.,  
701 which manufactures instrumentation for recording electropharyngeograms. The other authors  
702 have no competing interests.

703

704 **References**

- 705 Abel, E. L. (1971). Effects of marijuana on the solution of anagrams, memory and appetite.  
706 *Nature*, 231(5300), 260–261. <https://doi.org/10.1038/231260b0>
- 707 Abel, E. L. (1975). Cannabis: Effects on hunger and thirst. *Behavioral Biology*, 15(3), 255–281.  
708 [https://doi.org/10.1016/S0091-6773\(75\)91684-3](https://doi.org/10.1016/S0091-6773(75)91684-3)
- 709 Arnone, M., Maruani, J., Chaperon, F., Thiébot, M. H., Poncelet, M., Soubrié, P., & Le Fur, G.  
710 (1997). Selective inhibition of sucrose and ethanol intake by SR 141716, an antagonist of  
711 central cannabinoid (CB1) receptors. *Psychopharmacology*, 132(1), 104–106.  
712 <http://www.ncbi.nlm.nih.gov/pubmed/9272766>
- 713 Avery, L. (1993). Motor neuron M3 controls pharyngeal muscle relaxation timing in  
714 *Caenorhabditis elegans*. *The Journal of Experimental Biology*, 175, 283–297.  
715 <https://doi.org/10.1242/JEB.175.1.283>
- 716 Avery, L., & Horvitz, H. R. (1989). Pharyngeal pumping continues after laser killing of the  
717 pharyngeal nervous system of *C. elegans*. *Neuron*, 3(4), 473–485.  
718 [https://doi.org/10.1016/0896-6273\(89\)90206-7](https://doi.org/10.1016/0896-6273(89)90206-7)
- 719 Barbano, M. F., Castañé, A., Martín-García, E., & Maldonado, R. (2009). Delta-9-  
720 tetrahydrocannabinol enhances food reinforcement in a mouse operant conflict test.

- 721 *Psychopharmacology*, 205(3), 475–487. <https://doi.org/10.1007/s00213-009-1557-9>
- 722 Bargmann, C. I., Hartweg, E., & Horvitz, H. R. (1993). Odorant-selective genes and neurons  
723 mediate olfaction in *C. elegans*. *Cell*, 74(3), 515–527. <https://doi.org/10.1016/0092->  
724 8674(93)80053-H
- 725 Bargmann, C. I., & Horvitz, H. R. (1991). Chemosensory neurons with overlapping functions  
726 direct chemotaxis to multiple chemicals in *C. elegans*. *Neuron*, 7(5), 729–742.  
727 [https://doi.org/10.1016/0896-6273\(91\)90276-6](https://doi.org/10.1016/0896-6273(91)90276-6)
- 728 Bauer, M., Chicca, A., Tamborrini, M., Eisen, D., Lerner, R., Lutz, B., Poetz, O., Pluschke, G.,  
729 & Gertsch, J. (2012). Identification and quantification of a new family of peptide  
730 endocannabinoids (Pepcans) showing negative allosteric modulation at CB1 receptors. *The*  
731 *Journal of Biological Chemistry*, 287(44), 36944–36967.  
732 <https://doi.org/10.1074/JBC.M112.382481>
- 733 Brenner, S. (1974). The genetics of *Caenorhabditis elegans*. *Genetics*, 77(1), 71–94.  
734 <https://doi.org/10.1093/genetics/77.1.71>
- 735 Brown, J. E., Kassouny, M., & Cross, J. K. (1977). Kinetic studies of food intake and sucrose  
736 solution preference by rats treated with low doses of delta9-tetrahydrocannabinol.  
737 *Behavioral Biology*, 20(1), 104–110. <http://www.ncbi.nlm.nih.gov/pubmed/869847>
- 738 Calhoun, A. J., Tong, A., Pokala, N., Fitzpatrick, J. A. J., Sharpee, T. O., & Chalasani, S. H.  
739 (2015). Neural Mechanisms for Evaluating Environmental Variability in *Caenorhabditis*  
740 *elegans*. *Neuron*, 86(2), 428–441. <https://doi.org/10.1016/J.NEURON.2015.03.026>
- 741 Castro, D. C., & Berridge, K. C. (2017). Opioid and orexin hedonic hotspots in rat orbitofrontal  
742 cortex and insula. *Proceedings of the National Academy of Sciences of the United States of*  
743 *America*, 114(43), E9125–E9134. <https://doi.org/10.1073/PNAS.1705753114/->  
744 /DCSUPPLEMENTAL
- 745 Chalasani, S. H., Chronis, N., Tsunozaki, M., Gray, J. M., Ramot, D., Goodman, M. B., &  
746 Bargmann, C. I. (2007). Dissecting a circuit for olfactory behaviour in *Caenorhabditis*  
747 *elegans*. *Nature*, 450(7166), 63–70. <https://doi.org/10.1038/nature06292>
- 748 Chalasani, S. H., Kato, S., Albrecht, D. R., Nakagawa, T., Abbott, L. F., & Bargmann, C. I.  
749 (2010). Neuropeptide feedback modifies odor-evoked dynamics in *Caenorhabditis elegans*  
750 olfactory neurons. *Nature Neuroscience*, 13(5), 615–621. <https://doi.org/10.1038/nn.2526>
- 751 Collins, T. J. (2007). ImageJ for microscopy. *BioTechniques*, 43(1S), S25–S30.

- 752 <https://doi.org/10.2144/000112517>
- 753 Cristino, L., Becker, T., & Di Marzo, V. (2014). Endocannabinoids and energy homeostasis: An  
754 update. *BioFactors*, 40(4), 389–397. <https://doi.org/10.1002/BIOF.1168>
- 755 Davis, J. D., & Smith, G. P. (1992). Analysis of the microstructure of the rhythmic tongue  
756 movements of rats ingesting maltose and sucrose solutions - PubMed. *Behav Neurosci*,  
757 106(1), 217–228. <https://pubmed.ncbi.nlm.nih.gov/1554433/>
- 758 De Petrocellis, L., Melck, D., Bisogno, T., Milone, A., & Di Marzo, V. (1999). Finding of the  
759 endocannabinoid signalling system in Hydra, a very primitive organism: possible role in the  
760 feeding response. *Neuroscience*, 92(1), 377–387. [https://doi.org/10.1016/S0306-](https://doi.org/10.1016/S0306-4522(98)00749-0)  
761 4522(98)00749-0
- 762 Deshmukh, R. R., & Sharma, P. L. (2012). Stimulation of accumbens shell cannabinoid CB1  
763 receptors by noladin ether, a putative endocannabinoid, modulates food intake and dietary  
764 selection in rats. *Pharmacological Research*, 66(3), 276–282.  
765 <https://doi.org/10.1016/J.PHRS.2012.06.004>
- 766 Devane, W. A., Dysarz, F. A., Johnson, M. R., Melvin, L. S., & Howlett, A. C. (1988).  
767 Determination and characterization of a cannabinoid receptor in rat brain - PubMed. *Mol*  
768 *Pharmacol*, 34(5), 605–613. <https://pubmed.ncbi.nlm.nih.gov/2848184/>
- 769 Devine, C. E., & Simpson, F. O. (1968). Localization of tritiated norepinephrine in vascular  
770 sympathetic axons of the rat intestine and mesentery by electron microscope  
771 radioautography. *The Journal of Cell Biology*, 38(1), 184–192.  
772 <https://doi.org/10.1083/JCB.38.1.184>
- 773 Edwards, A., & Abizaid, A. (2016). Driving the need to feed: Insight into the collaborative  
774 interaction between ghrelin and endocannabinoid systems in modulating brain reward  
775 systems. *Neuroscience and Biobehavioral Reviews*, 66, 33–53.  
776 <https://doi.org/10.1016/J.NEUBIOREV.2016.03.032>
- 777 Elphick, M. R. (2012). The evolution and comparative neurobiology of endocannabinoid  
778 signalling. *Philosophical Transactions of the Royal Society of London. Series B, Biological*  
779 *Sciences*, 367(1607), 3201–3215. <https://doi.org/10.1098/RSTB.2011.0394>
- 780 Escartín-Pérez, R. E., Cendejas-Trejo, N. M., Cruz-Martínez, A. M., González-Hernández, B.,  
781 Mancilla-Díaz, J. M., & Florán-Garduño, B. (2009a). Role of cannabinoid CB1 receptors on  
782 macronutrient selection and satiety in rats. *Physiology & Behavior*, 96(4–5), 646–650.

- 783 <https://doi.org/10.1016/J.PHYSBEH.2008.12.017>
- 784 Escartín-Pérez, R. E., Cendejas-Trejo, N. M., Cruz-Martínez, A. M., González-Hernández, B.,  
785 Mancilla-Díaz, J. M., & Florán-Garduño, B. (2009b). Role of cannabinoid CB1 receptors on  
786 macronutrient selection and satiety in rats. *Physiology & Behavior*, *96*(4–5), 646–650.  
787 <https://doi.org/10.1016/J.PHYSBEH.2008.12.017>
- 788 Fitzgerald, M. L., Mackie, K., & Pickel, V. M. (2019). Ultrastructural localization of  
789 cannabinoid CB1 and mGluR5 receptors in the prefrontal cortex and amygdala. *Journal of*  
790 *Comparative Neurology*, *527*(16), 2730–2741. <https://doi.org/10.1002/CNE.24704>
- 791 Foltin, R. W., Brady, J. V., & Fischman, M. W. (1986). Behavioral analysis of marijuana effects  
792 on food intake in humans. *Pharmacology Biochemistry and Behavior*, *25*(3), 577–582.  
793 [https://doi.org/10.1016/0091-3057\(86\)90144-9](https://doi.org/10.1016/0091-3057(86)90144-9)
- 794 Foltin, R. W., Fischman, M. W., & Byrne, M. F. (1988). Effects of smoked marijuana on food  
795 intake and body weight of humans living in a residential laboratory. *Appetite*, *11*(1), 1–14.  
796 [https://doi.org/10.1016/S0195-6663\(88\)80017-5](https://doi.org/10.1016/S0195-6663(88)80017-5)
- 797 Fraenkel, G. S., & Gunn, D. L. (1961). *The orientation of animals: Kineses, taxes and compass*  
798 *reactions*. - *PsycNET*. Dover. <https://psycnet.apa.org/record/1963-04582-000>
- 799 Freedland, C. S., Poston, J. S., & Porrino, L. J. (2000). Effects of SR141716A, a central  
800 cannabinoid receptor antagonist, on food-maintained responding. *Pharmacology,*  
801 *Biochemistry, and Behavior*, *67*(2), 265–270. [https://doi.org/10.1016/S0091-](https://doi.org/10.1016/S0091-3057(00)00359-2)  
802 [3057\(00\)00359-2](https://doi.org/10.1016/S0091-3057(00)00359-2)
- 803 Frézal, L., & Félix, M. A. (2015). The Natural History of Model Organisms: *C. elegans* outside  
804 the Petri dish. *ELife*, *2015*(4). <https://doi.org/10.7554/ELIFE.05849.001>
- 805 Fu, J., Bottegoni, G., Sasso, O., Bertorelli, R., Rocchia, W., Masetti, M., Guijarro, A., Lodola,  
806 A., Armirotti, A., Garau, G., Bandiera, T., Reggiani, A., Mor, M., Cavalli, A., & Piomelli,  
807 D. (2011). A catalytically silent FAAH-1 variant drives anandamide transport in neurons.  
808 *Nature Neuroscience*, *15*(1), 64–69. <https://doi.org/10.1038/NN.2986>
- 809 Gallate, J. E., & McGregor, I. S. (1999). The motivation for beer in rats: effects of ritanserin,  
810 naloxone and SR 141716. *Psychopharmacology*, *142*(3), 302–308.  
811 <https://doi.org/10.1007/S002130050893>
- 812 Gallate, J. E., Saharov, T., Mallet, P. E., & McGregor, I. S. (1999). Increased motivation for beer  
813 in rats following administration of a cannabinoid CB1 receptor agonist. *European Journal*

- 814 *of Pharmacology*, 370(3), 233–240. [https://doi.org/10.1016/S0014-2999\(99\)00170-3](https://doi.org/10.1016/S0014-2999(99)00170-3)
- 815 Gessa, G. L., Orrù, A., Lai, P., Maccioni, P., Lecca, R., Lobina, C., Carai, M. A. M., &  
816 Colombo, G. (2006). Lack of tolerance to the suppressing effect of rimonabant on chocolate  
817 intake in rats. *Psychopharmacology*, 185(2), 248–254. [https://doi.org/10.1007/S00213-006-](https://doi.org/10.1007/S00213-006-0327-1/FIGURES/4)  
818 [0327-1/FIGURES/4](https://doi.org/10.1007/S00213-006-0327-1/FIGURES/4)
- 819 Gordus, A., Pokala, N., Levy, S., Flavell, S. W., & Bargmann, C. I. (2015). Feedback from  
820 Network States Generates Variability in a Probabilistic Olfactory Circuit. *Cell*, 161(2), 215–  
821 227. <https://doi.org/10.1016/j.cell.2015.02.018>
- 822 Gray, J. M., Hill, J. J., & Bargmann, C. I. (2005). A dual mechanosensory and chemosensory  
823 neuron in *Caenorhabditis elegans*. *PNAS*, 90(6), 2227–2231.  
824 <https://doi.org/10.1073/pnas.90.6.2227>
- 825 Grill, H. J., & Norgren, R. (1978). The taste reactivity test. I. Mimetic responses to gustatory  
826 stimuli in neurologically normal rats. *Brain Research*, 143(2), 263–279.  
827 [https://doi.org/10.1016/0006-8993\(78\)90568-1](https://doi.org/10.1016/0006-8993(78)90568-1)
- 828 Guegan, T., Cutando, L., Ayuso, E., Santini, E., Fisone, G., Bosch, F., Martinez, A., Valjent, E.,  
829 Maldonado, R., & Martin, M. (2013). Operant behavior to obtain palatable food modifies  
830 neuronal plasticity in the brain reward circuit. *European Neuropsychopharmacology : The*  
831 *Journal of the European College of Neuropsychopharmacology*, 23(2), 146–159.  
832 <https://doi.org/10.1016/J.EURONEURO.2012.04.004>
- 833 Halikas, J., Goodwin, D., & Guze, S. (1971). Marijuana effects. A survey of regular users.  
834 *JAMA*, 217(5), 692–694. <https://doi.org/10.1001/JAMA.217.5.692>
- 835 Hammarlund, M., Hobert, O., Miller, D. M., & Sestan, N. (2018). The CeNGEN Project: The  
836 Complete Gene Expression Map of an Entire Nervous System. *Neuron*, 99(3), 430–433.  
837 <https://doi.org/10.1016/J.NEURON.2018.07.042>
- 838 Harrison, N., Lone, M. A., Kaul, T. K., Reis Rodrigues, P., Ogungbe, I. V., & Gill, M. S. (2014).  
839 Characterization of N-Acyl Phosphatidylethanolamine-Specific Phospholipase-D Isoforms  
840 in the Nematode *Caenorhabditis elegans*. *PLoS ONE*, 9(11), e113007.  
841 <https://doi.org/10.1371/journal.pone.0113007>
- 842 Hart, A. C. (2006). Behavior. In *WormBook*. The *C. elegans* Research Community.  
843 <https://doi.org/10.1895/WORMBOOK.1.87.1>
- 844 Heinbockel, T., & Straiker, A. (2021). Cannabinoids Regulate Sensory Processing in Early

- 845 Olfactory and Visual Neural Circuits. *Frontiers in Neural Circuits*, 15.  
846 <https://doi.org/10.3389/FNCIR.2021.662349>
- 847 Higgs, S., Williams, C. M., & Kirkham, T. C. (2003). Cannabinoid influences on palatability:  
848 microstructural analysis of sucrose drinking after  $\Delta^9$ -tetrahydrocannabinol, anandamide, 2-  
849 arachidonoyl glycerol and SR141716. *Psychopharmacology*, 165(4), 370–377.  
850 <https://doi.org/10.1007/s00213-002-1263-3>
- 851 Hollister, L. E. (1971). Hunger and appetite after single doses of marijuana, alcohol, and  
852 dextroamphetamine. *Clinical Pharmacology and Therapeutics*, 12(1), 44–49.  
853 <https://doi.org/10.1002/CPT197112144>
- 854 Izquierdo, P. G., O'Connor, V., Green, A. C., Holden-Dye, L., & Tattersall, J. E. H. (2021). C.  
855 elegans pharyngeal pumping provides a whole organism bio-assay to investigate anti-  
856 cholinesterase intoxication and antidotes. *NeuroToxicology*, 82, 50–62.  
857 <https://doi.org/10.1016/J.NEURO.2020.11.001>
- 858 Jarrett, M. M., Limebeer, C. L., & Parker, L. A. (2005). Effect of  $\Delta^9$ -tetrahydrocannabinol on  
859 sucrose palatability as measured by the taste reactivity test. *Physiology and Behavior*, 86(4),  
860 475–479. <https://doi.org/10.1016/j.physbeh.2005.08.033>
- 861 Jin, W., Brown, S., Roche, J. P., Hsieh, C., Cerver, J. P., Koo, A., Chavkin, C., & Mackie, K.  
862 (1999). Distinct domains of the CB1 cannabinoid receptor mediate desensitization and  
863 internalization. *The Journal of Neuroscience : The Official Journal of the Society for*  
864 *Neuroscience*, 19(10), 3773–3780. <https://doi.org/10.1523/JNEUROSCI.19-10-03773.1999>
- 865 Kaczocha, M., Glaser, S. T., & Deutsch, D. G. (2009). Identification of intracellular carriers for  
866 the endocannabinoid anandamide. *Proceedings of the National Academy of Sciences*,  
867 106(15), 6375–6380. <https://doi.org/10.1073/PNAS.0901515106>
- 868 Kaczocha, M., Vivieca, S., Sun, J., Glaser, S. T., & Deutsch, D. G. (2012). Fatty acid-binding  
869 proteins transport N-acyl ethanolamines to nuclear receptors and are targets of  
870 endocannabinoid transport inhibitors. *The Journal of Biological Chemistry*, 287(5), 3415–  
871 3424. <https://doi.org/10.1074/JBC.M111.304907>
- 872 Keppel, G., & Zedeck, S. (1989). *Data analysis for research designs : analysis-of-variance and*  
873 *multiple regression/correlation approaches*. 594.
- 874 Kirkham, T. C., & Williams, C. M. (2001). Endogenous cannabinoids and appetite. *Nutrition*  
875 *Research Reviews*, 14(1), 65–86. <https://doi.org/10.1079/NRR200118>



- 876 Kirkham, T. C., Williams, C. M., Fezza, F., & Di Marzo, V. (2002). Endocannabinoid levels in  
877 rat limbic forebrain and hypothalamus in relation to fasting, feeding and satiation:  
878 stimulation of eating by 2-arachidonoyl glycerol. *British Journal of Pharmacology*, *136*(4),  
879 550. <https://doi.org/10.1038/SJ.BJP.0704767>
- 880 Kocabas, A., Shen, C. H., Guo, Z. V., & Ramanathan, S. (2012). Controlling interneuron activity  
881 in *Caenorhabditis elegans* to evoke chemotactic behaviour. *Nature*, *490*(7419), 273–277.  
882 <https://doi.org/10.1038/nature11431>
- 883 Koch, J. E., & Matthews, S. M. (2001). Delta9-tetrahydrocannabinol stimulates palatable food  
884 intake in Lewis rats: effects of peripheral and central administration. *Nutritional*  
885 *Neuroscience*, *4*(3), 179–187. <http://www.ncbi.nlm.nih.gov/pubmed/11842887>
- 886 Koga, M., & Ohshima, Y. (2004). The *C. elegans* *ceh-36* gene encodes a putative  
887 homedomain transcription factor involved in chemosensory functions of ASE and AWC  
888 neurons. *Journal of Molecular Biology*, *336*(3), 579–587.  
889 <https://doi.org/10.1016/J.JMB.2003.12.037>
- 890 Lanjuin, A., VanHoven, M. K., Bargmann, C. I., Thompson, J. K., & Sengupta, P. (2003).  
891 *Otx/otd* homeobox genes specify distinct sensory neuron identities in *C. elegans*.  
892 *Developmental Cell*, *5*(4), 621–633. [https://doi.org/10.1016/S1534-5807\(03\)00293-4](https://doi.org/10.1016/S1534-5807(03)00293-4)
- 893 Lehtonen, M., Reisner, K., Auriola, S., Wong, G., & Callaway, J. C. (2008). Mass-Spectrometric  
894 Identification of Anandamide and 2-Arachidonoylglycerol in Nematodes. *Chemistry &*  
895 *Biodiversity*, *5*(11), 2431–2441. <https://doi.org/10.1002/cbdv.200890208>
- 896 Lehtonen, M., Storvik, M., Malinen, H., Hyytiä, P., Lakso, M., Auriola, S., Wong, G., &  
897 Callaway, J. C. (2011). Determination of endocannabinoids in nematodes and human brain  
898 tissue by liquid chromatography electrospray ionization tandem mass spectrometry. *Journal*  
899 *of Chromatography B*, *879*(11–12), 677–694.  
900 <https://doi.org/10.1016/J.JCHROMB.2011.02.004>
- 901 Leinwand, S. G., & Chalasani, S. H. (2013). Neuropeptide signaling remodels chemosensory  
902 circuit composition in *Caenorhabditis elegans*. *Nature Neuroscience*, *16*(10), 1461–1467.  
903 <https://doi.org/10.1038/nn.3511>
- 904 Leinwand, S. G., Yang, C. J., Bazopoulou, D., Chronis, N., Srinivasan, J., & Chalasani, S. H.  
905 (2015). Circuit mechanisms encoding odors and driving aging-associated behavioral  
906 declines in *Caenorhabditis elegans*. *ELife*, *4*(September 2015).

- 907 <https://doi.org/10.7554/ELIFE.10181>
- 908 Liedhegner, E. S., Vogt, C. D., Sem, D. S., Cunningham, C. W., & Hillard, C. J. (2014). Sterol  
909 carrier protein-2: binding protein for endocannabinoids. *Molecular Neurobiology*, *50*(1),  
910 149–158. <https://doi.org/10.1007/S12035-014-8651-7>
- 911 Lockery, S. R., Hulme, S. E., Roberts, W. M., Robinson, K. J., Laromaine, A., Lindsay, T. H.,  
912 Whitesides, G. M., & Weeks, J. C. (2012). A microfluidic device for whole-animal drug  
913 screening using electrophysiological measures in the nematode *C. elegans*. *Lab on a Chip*,  
914 *12*(12), 2211–2220. <https://doi.org/10.1039/c2lc00001f>
- 915 Lucanic, M., Held, J. M., Vantipalli, M. C., Klang, I. M., Graham, J. B., Gibson, B. W., Lithgow,  
916 G. J., & Gill, M. S. (2011). N-acylethanolamine signalling mediates the effect of diet on  
917 lifespan in *Caenorhabditis elegans*. *Nature*, *473*(7346), 226–229.  
918 <https://doi.org/10.1038/nature10007>
- 919 Maccioni, P., Pes, D., Carai, M. A. M., Gessa, G. L., & Colombo, G. (2008). Suppression by the  
920 cannabinoid CB1 receptor antagonist, rimonabant, of the reinforcing and motivational  
921 properties of a chocolate-flavoured beverage in rats. *Behavioural Pharmacology*, *19*(3),  
922 197–209. <https://doi.org/10.1097/FBP.0B013E3282FE8888>
- 923 Mahler, S. V., Smith, K. S., & Berridge, K. C. (2007). Endocannabinoid Hedonic Hotspot for  
924 Sensory Pleasure: Anandamide in Nucleus Accumbens Shell Enhances ‘Liking’ of a Sweet  
925 Reward. *Neuropsychopharmacology*, *32*(11), 2267–2278.  
926 <https://doi.org/10.1038/sj.npp.1301376>
- 927 Martini, L., Waldhoer, M., Pusch, M., Kharazia, V., Fong, J., Lee, J. H., Freissmuth, C., &  
928 Whistler, J. L. (2007). Ligand-induced down-regulation of the cannabinoid 1 receptor is  
929 mediated by the G-protein-coupled receptor-associated sorting protein GASP1. *FASEB*  
930 *Journal : Official Publication of the Federation of American Societies for Experimental*  
931 *Biology*, *21*(3), 802–811. <https://doi.org/10.1096/FJ.06-7132COM>
- 932 Mathes, C. M., Ferrara, M., & Rowland, N. E. (2008). Cannabinoid-1 receptor antagonists  
933 reduce caloric intake by decreasing palatable diet selection in a novel dessert protocol in  
934 female rats. *American Journal of Physiology. Regulatory, Integrative and Comparative*  
935 *Physiology*, *295*(1), R67. <https://doi.org/10.1152/AJPREGU.00150.2008>
- 936 Mathew, M. D., Mathew, N. D., & Ebert, P. R. (2012). WormScan: A technique for high-  
937 throughput phenotypic analysis of *Caenorhabditis elegans*. *PLoS ONE*, *7*(3), e33483.

- 938 <https://doi.org/10.1371/journal.pone.0033483>
- 939 McLaughlin, P. J., Winston, K., Swezey, L., Wisniecki, A., Aberman, J., Tardif, D. J., Betz, A.  
940 J., Ishiwari, K., Makriyannis, A., & Salamone, J. D. (2003). The cannabinoid CB1  
941 antagonists SR 141716A and AM 251 suppress food intake and food-reinforced behavior in  
942 a variety of tasks in rats. *Behavioural Pharmacology*, *14*(8), 583–588.  
943 <https://doi.org/10.1097/00008877-200312000-00002>
- 944 Munro, S., Thomas, K. L., & Abu-Shaar, M. (1993). Molecular characterization of a peripheral  
945 receptor for cannabinoids. *Nature*, *365*(6441), 61–65. <https://doi.org/10.1038/365061a0>
- 946 Nogi, Y., Ahasan, M. M., Murata, Y., Taniguchi, M., Sha, M. F. R., Ijichi, C., & Yamaguchi, M.  
947 (2020). Expression of feeding-related neuromodulatory signalling molecules in the mouse  
948 central olfactory system. *Scientific Reports*, *10*(1). [https://doi.org/10.1038/S41598-020-](https://doi.org/10.1038/S41598-020-57605-7)  
949 [57605-7](https://doi.org/10.1038/S41598-020-57605-7)
- 950 Oakes, M., Law, W. J., Clark, T., Bamber, B., & Komuniecki, R. (2017). Cannabinoids activate  
951 monoaminergic signaling to modulate key *C. elegans* behaviors. *Journal of Neuroscience*,  
952 *37*(11), 2859–2869. <https://doi.org/10.1523/JNEUROSCI.3151-16.2017>
- 953 Oakes, M., Law, W. J., & Komuniecki, R. (2019). Cannabinoids stimulate the TRP channel-  
954 dependent release of both serotonin and dopamine to modulate behavior in *C. elegans*.  
955 *Journal of Neuroscience*, *39*(21), 4142–4152. [https://doi.org/10.1523/JNEUROSCI.2371-](https://doi.org/10.1523/JNEUROSCI.2371-18.2019)  
956 [18.2019](https://doi.org/10.1523/JNEUROSCI.2371-18.2019)
- 957 Oddi, S., Fezza, F., Pasquariello, N., D’Agostino, A., Catanzaro, G., De Simone, C., Rapino, C.,  
958 Finazzi-Agrò, A., & Maccarrone, M. (2009). Molecular identification of albumin and  
959 Hsp70 as cytosolic anandamide-binding proteins. *Chemistry & Biology*, *16*(6), 624–632.  
960 <https://doi.org/10.1016/J.CHEMBIOL.2009.05.004>
- 961 Park, S. H., Staples, S. K., Gostin, E. L., Smith, J. P., Vigil, J. J., Seifried, D., Kinney, C., Pauli,  
962 C. S., & Heuvel, B. D. V. (2019). Contrasting Roles of Cannabidiol as an Insecticide and  
963 Rescuing Agent for Ethanol-induced Death in the Tobacco Hornworm *Manduca sexta*.  
964 *Scientific Reports*, *9*(1). <https://doi.org/10.1038/S41598-019-47017-7>
- 965 Parker, L. (2017). *Cannabinoids and the Brain*. The MIT Press. <https://muse.jhu.edu/book/49695>
- 966 Parsons, L. H., & Hurd, Y. L. (2015). Endocannabinoid signalling in reward and addiction.  
967 *Nature Reviews. Neuroscience*, *16*(10), 579–594. <https://doi.org/10.1038/NRN4004>
- 968 Pastuhov, S. I., Fujiki, K., Nix, P., Kanao, S., Bastiani, M., Matsumoto, K., & Hisamoto, N.

- 969 (2012). Endocannabinoid-Go $\alpha$  signalling inhibits axon regeneration in *Caenorhabditis*  
970 *elegans* by antagonizing Gq $\alpha$ -PKC-JNK signalling. *Nature Communications*, 3(1), 1136.  
971 <https://doi.org/10.1038/ncomms2136>
- 972 Pastuhov, S. I., Matsumoto, K., & Hisamoto, N. (2016). Endocannabinoid signaling regulates  
973 regenerative axon navigation in *Caenorhabditis elegans* via the GPCRs NPR-19 and NPR-  
974 32. *Genes to Cells*, 21(7), 696–705. <https://doi.org/10.1111/gtc.12377>
- 975 Pereira, L., Kratsios, P., Serrano-Saiz, E., Sheftel, H., Mayo, A. E., Hall, D. H., White, J. G.,  
976 LeBoeuf, B., Garcia, L. R., Alon, U., & Hobert, O. (2015). A cellular and regulatory map of  
977 the cholinergic nervous system of *C. elegans*. *ELife*, 4, e12432.  
978 <https://doi.org/10.7554/eLife.12432>
- 979 Pierce-Shimomura, J. T., Morse, T. M., & Lockery, S. R. (1999). The Fundamental Role of  
980 Pirouettes in *Caenorhabditis elegans* Chemotaxis. *Journal of Neuroscience*, 19(21), 9557–  
981 9569. <https://doi.org/10.1523/JNEUROSCI.19-21-09557.1999>
- 982 Probert, L., De Mey, J., & Polak, J. M. (1983). Ultrastructural localization of four different  
983 neuropeptides within separate populations of p-type nerves in the guinea pig colon.  
984 *Gastroenterology*, 85(5), 1094–1104. [https://doi.org/10.1016/S0016-5085\(83\)80077-8](https://doi.org/10.1016/S0016-5085(83)80077-8)
- 985 Raible, F., & Arendt, D. (2004). Metazoan Evolution: Some Animals Are More Equal than  
986 Others. *Current Biology*, 14(3), R106–R108. <https://doi.org/10.1016/J.CUB.2004.01.015>
- 987 Raizen, D M, Lee, R. Y., & Avery, L. (1995). Interacting genes required for pharyngeal  
988 excitation by motor neuron MC in *Caenorhabditis elegans*. *Genetics*, 141(4), 1365–1382.  
989 <https://doi.org/10.1093/GENETICS/141.4.1365>
- 990 Raizen, David M., & Avery, L. (1994). Electrical activity and behavior in the pharynx of  
991 *caenorhabditis elegans*. *Neuron*, 12(3), 483–495. [https://doi.org/10.1016/0896-  
992 6273\(94\)90207-0](https://doi.org/10.1016/0896-6273(94)90207-0)
- 993 Rand, J. B., & Johnson, C. D. (1995). Genetic pharmacology: interactions between drugs and  
994 gene products in *Caenorhabditis elegans*. *Methods in Cell Biology*, 48(C), 187–204.  
995 [https://doi.org/10.1016/S0091-679X\(08\)61388-6](https://doi.org/10.1016/S0091-679X(08)61388-6)
- 996 Reis-Rodrigues, P., Kaul, T. K., Ho, J.-H., Lucanic, M., Burkewitz, K., Mair, W. B., Held, J. M.,  
997 Bohn, L. M., & Gill, M. S. (2016). Synthetic Ligands of Cannabinoid Receptors Affect  
998 Dauer Formation in the Nematode *Caenorhabditis elegans*. *G3 (Bethesda, Md.)*, 6(6), 1695–  
999 1705. <https://doi.org/10.1534/g3.116.026997>

- 1000 Richmond, J. E., Davis, W. S., & Jorgensen, E. M. (1999). UNC-13 is required for synaptic  
1001 vesicle fusion in *C. elegans*. *Nature Neuroscience*, 2(11), 959–964.  
1002 <https://doi.org/10.1038/14755>
- 1003 Rozenfeld, R., & Devi, L. A. (2008). Regulation of CB1 cannabinoid receptor trafficking by the  
1004 adaptor protein AP-3. *FASEB Journal : Official Publication of the Federation of American*  
1005 *Societies for Experimental Biology*, 22(7), 2311–2322. [https://doi.org/10.1096/FJ.07-](https://doi.org/10.1096/FJ.07-102731)  
1006 102731
- 1007 Salamone, J. D., Cousins, M. S., & Bucher, S. (1994). Anhedonia or anergia? Effects of  
1008 haloperidol and nucleus accumbens dopamine depletion on instrumental response selection  
1009 in a T-maze cost/benefit procedure. *Behavioural Brain Research*, 65(2), 221–229.  
1010 [https://doi.org/10.1016/0166-4328\(94\)90108-2](https://doi.org/10.1016/0166-4328(94)90108-2)
- 1011 Salamone, J. D., McLaughlin, P. J., Sink, K., Makriyannis, A., & Parker, L. A. (2007).  
1012 Cannabinoid CB1 receptor inverse agonists and neutral antagonists: effects on food intake,  
1013 food-reinforced behavior and food aversions. *Physiology & Behavior*, 91(4), 383–388.  
1014 <https://doi.org/10.1016/J.PHYSBEH.2007.04.013>
- 1015 Sandhu, A., Badal, D., Sheokand, R., Tyagi, S., & Singh, V. (2021). Specific collagens maintain  
1016 the cuticle permeability barrier in *Caenorhabditis elegans*. *Genetics*, 217(3).  
1017 <https://doi.org/10.1093/GENETICS/IYAA047>
- 1018 Serrano-Saiz, E., Poole, R. J., Felton, T., Zhang, F., De La Cruz, E. D., & Hobert, O. (2013).  
1019 Modular Control of Glutamatergic Neuronal Identity in *C. elegans* by Distinct  
1020 Homeodomain Proteins. *Cell*, 155(3), 659–673.  
1021 <https://doi.org/10.1016/J.CELL.2013.09.052>
- 1022 Shinohara, Y., Inui, T., Yamamoto, T., & Shimura, T. (2009). Cannabinoid in the nucleus  
1023 accumbens enhances the intake of palatable solution. *Neuroreport*, 20(15), 1382–1385.  
1024 <https://doi.org/10.1097/WNR.0B013E3283318010>
- 1025 Shtonda, B. B. (2006). Dietary choice behavior in *Caenorhabditis elegans*. *Journal of*  
1026 *Experimental Biology*. <https://doi.org/10.1242/jeb.01955>
- 1027 Simiand, J., Keane, M., Keane, P. E., & Soubrié, P. (1998). SR 141716, a CB1 cannabinoid  
1028 receptor antagonist, selectively reduces sweet food intake in marmoset. *Behavioural*  
1029 *Pharmacology*, 9(2), 179–181. <http://www.ncbi.nlm.nih.gov/pubmed/10065938>
- 1030 Soria-Gómez, E., Bellocchio, L., Reguero, L., Lepousez, G., Martin, C., Bendahmane, M.,

- 1031 Ruehle, S., Remmers, F., Desprez, T., Matias, I., Wiesner, T., Cannich, A., Nissant, A.,  
1032 Wadleigh, A., Pape, H.-C., Chiarlone, A. P., Quarta, C., Verrier, D., Vincent, P., ...  
1033 Marsicano, G. (2014). The endocannabinoid system controls food intake via olfactory  
1034 processes. *Nature Neuroscience*, *17*(3), 407–415. <https://doi.org/10.1038/nn.3647>
- 1035 Speese, S., Petrie, M., Schuske, K., Ailion, M., Ann, K., Iwasaki, K., Jorgensen, E. M., &  
1036 Martin, T. F. J. (2007). UNC-31 (CAPS) Is Required for Dense-Core Vesicle But Not  
1037 Synaptic Vesicle Exocytosis in *Caenorhabditis elegans*. *Journal of Neuroscience*, *27*(23),  
1038 6150–6162. <https://doi.org/10.1523/JNEUROSCI.1466-07.2007>
- 1039 Stroustrup, N., Ulmschneider, B. E., Nash, Z. M., López-Moyado, I. F., Apfeld, J., & Fontana,  
1040 W. (2013). The *caenorhabditis elegans* lifespan machine. *Nature Methods*, *10*(7), 665–670.  
1041 <https://doi.org/10.1038/nmeth.2475>
- 1042 Sugiura, T., Kondo, S., Sukagawa, A., Nakane, S., Shinoda, A., Itoh, K., Yamashita, A., &  
1043 Waku, K. (1995). 2-Arachidonoylglycerol: A Possible Endogenous Cannabinoid Receptor  
1044 Ligand in Brain. *Biochemical and Biophysical Research Communications*, *215*(1), 89–97.  
1045 <https://doi.org/10.1006/BBRC.1995.2437>
- 1046 Takács, V. T., Szőnyi, A., Freund, T. F., Nyiri, G., & Gulyás, A. I. (2014). Quantitative  
1047 ultrastructural analysis of basket and axo-axonic cell terminals in the mouse hippocampus.  
1048 *Brain Structure and Function* *2014* *220*:2, *220*(2), 919–940.  
1049 <https://doi.org/10.1007/S00429-013-0692-6>
- 1050 Tart, C. T. (1970). Marijuana Intoxication : Common Experiences. *Nature* *1970* *226*:5247,  
1051 *226*(5247), 701–704. <https://doi.org/10.1038/226701a0>
- 1052 Thornton-Jones, Z. D., Vickers, S. P., & Clifton, P. G. (2005). The cannabinoid CB1 receptor  
1053 antagonist SR141716A reduces appetitive and consummatory responses for food.  
1054 *Psychopharmacology*, *179*(2), 452–460. <https://doi.org/10.1007/S00213-004-2047-8>
- 1055 Williams, C. M., & Kirkham, T. C. (1999). Anandamide induces overeating: Mediation by  
1056 central cannabinoid (CB1) receptors. *Psychopharmacology*, *143*(3), 315–317.  
1057 <https://doi.org/10.1007/s002130050953>
- 1058 Williams, C. M., Rogers, P. J., & Kirkham, T. C. (1998). Hyperphagia in pre-fed rats following  
1059 oral  $\delta$ 9-THC. *Physiology and Behavior*, *65*(2), 343–346. [https://doi.org/10.1016/S0031-](https://doi.org/10.1016/S0031-9384(98)00170-X)  
1060 [9384\(98\)00170-X](https://doi.org/10.1016/S0031-9384(98)00170-X)
- 1061 Yoshida, R., Niki, M., Jyotaki, M., Sanematsu, K., Shigemura, N., & Ninomiya, Y. (2013).

1062 Modulation of sweet responses of taste receptor cells. *Seminars in Cell & Developmental*  
1063 *Biology*, 24(3), 226–231. <https://doi.org/10.1016/J.SEMCDB.2012.08.004>  
1064 Yoshida, R., Ohkuri, T., Jyotaki, M., Yasuo, T., Horio, N., Yasumatsu, K., Sanematsu, K.,  
1065 Shigemura, N., Yamamoto, T., Margolskee, R. F., & Ninomiya, Y. (2010).  
1066 Endocannabinoids selectively enhance sweet taste. *Proceedings of the National Academy of*  
1067 *Sciences of the United States of America*, 107(2), 935–939.  
1068 <https://doi.org/10.1073/pnas.0912048107>  
1069 Zaslaver, A., Liani, I., Shtangel, O., Ginzburg, S., Yee, L., & Sternberg, P. W. (2015).  
1070 Hierarchical sparse coding in the sensory system of *Caenorhabditis elegans*. *Proceedings of*  
1071 *the National Academy of Sciences of the United States of America*, 112(4), 1185–1189.  
1072 <https://doi.org/10.1073/pnas.1423656112>  
1073  
1074  
1075  
1076  
1077  
1078  
1079  
1080  
1081  
1082  
1083  
1084  
1085  
1086  
1087  
1088

## Supplemental material

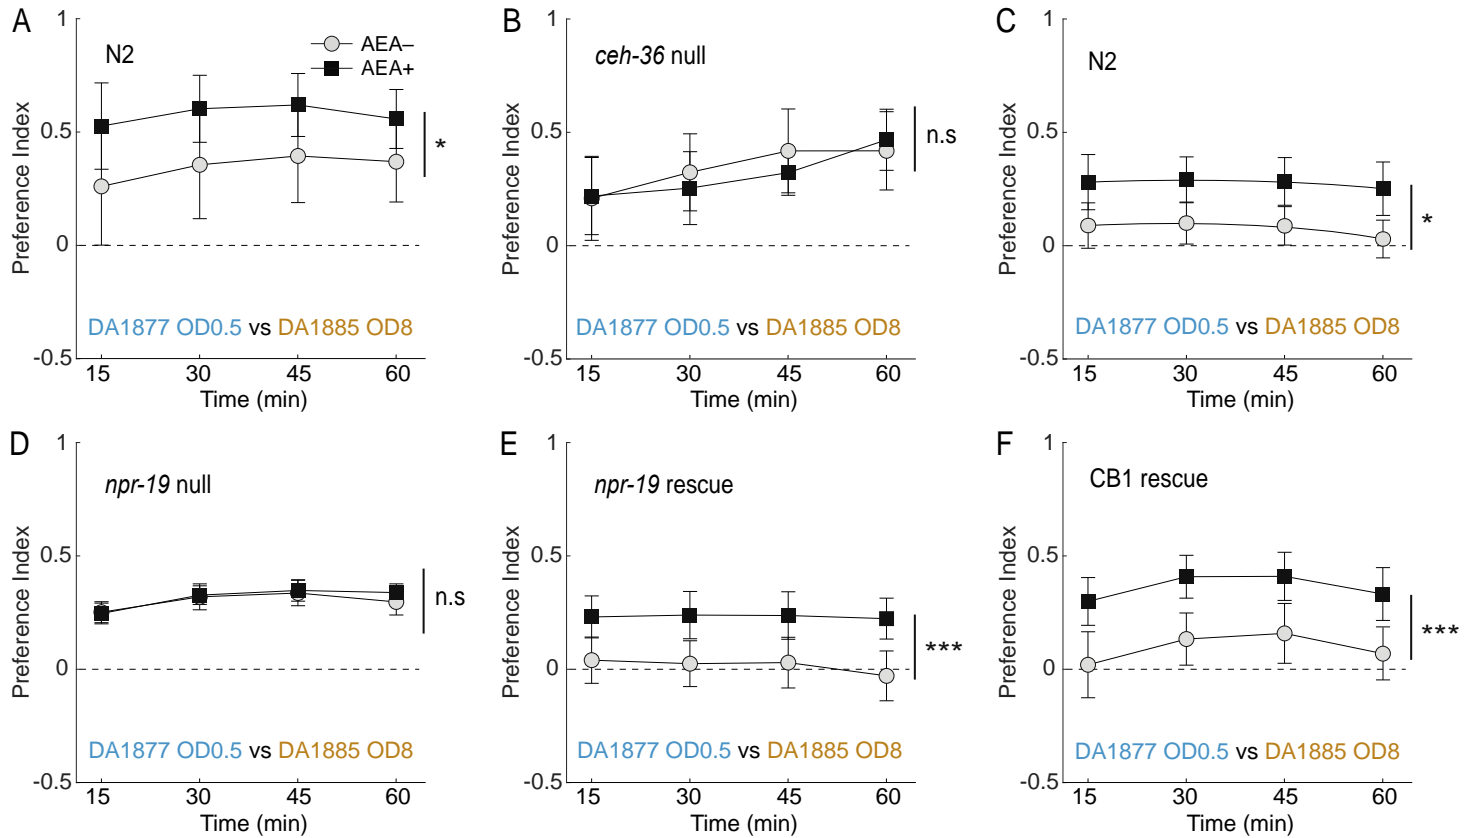

**Supp. Fig 1. Effect of baseline preference and bacteria identity on preference time course.** Mean preference index ( $I$ ) versus time for AEA-exposed animals (AEA+) and unexposed controls (AEA-), where  $I > 0$  is preference for favored food,  $I < 0$  is preference for non-favored food, and  $I = 0$  is indifference (*dashed line*). **A**. Time course, Fig. 1D. **B**. Time course, Fig. 1E. **C**. Time course, Fig. 1F. For statistics in **A-C**, see Supp. Table 1. Symbols: \*,  $p < 0.05$ ; \*\*,  $p < 0.01$ ; n.s., not significant. Error bars, 95% confidence intervals.



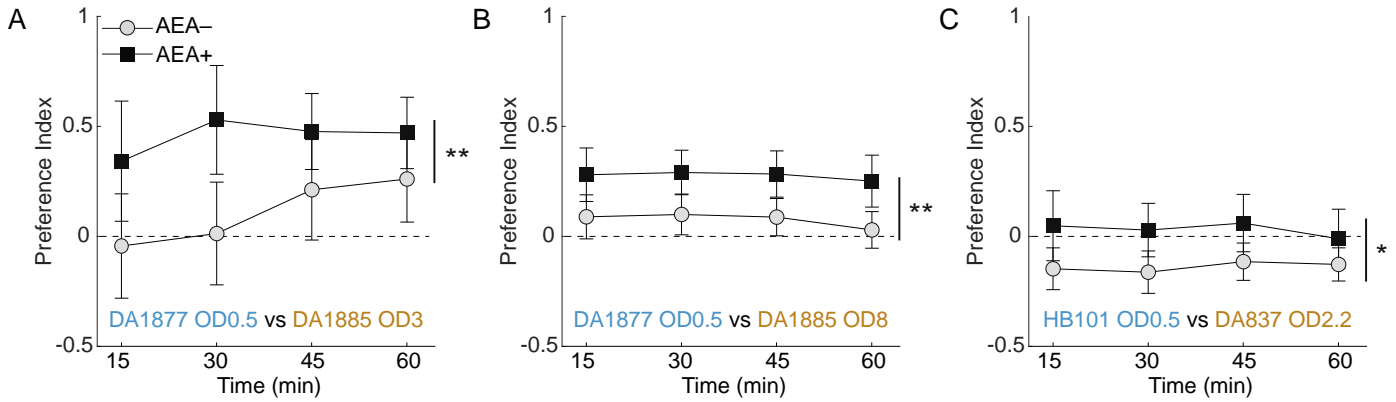

**Supp. Fig 2. Effect of genetic background on preference time course.** Mean preference index ( $I$ ) versus time for AEA-exposed animals (AEA+) and unexposed controls (AEA-), where  $I > 0$  is preference for favored food,  $I < 0$  is preference for non-favored food, and  $I = 0$  is indifference (dashed line). **A.** Time course, Fig. 2B, N2. **B.** Time course, Fig. 2B, *ceh-36*. **C.** Time course, Fig. 3A, N2. **D.** Time course, Fig. 3A, *npr-19* null. **E.** Time course, Fig. 3A, *npr-19* rescue. **F.** Time course, Fig. 3A, CB1 rescue. **A-F.** For statistics, see Supp. Tables 2, 3. Symbols: \*,  $p < 0.05$ ; \*\*\*,  $p < 0.001$ ; n.s., not significant. Error bars, 95% confidence intervals.

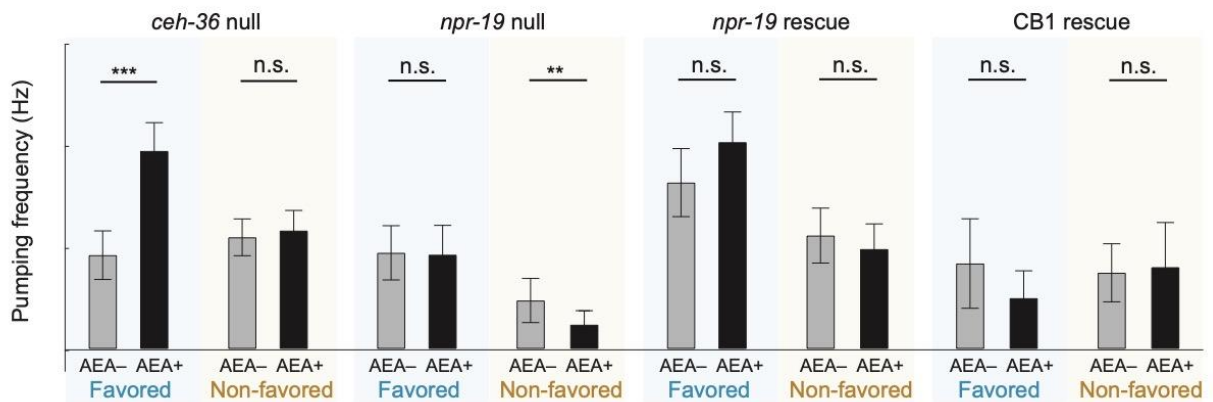

**Supp. Fig 3. Effect of AEA on pharyngeal pumping frequency in different genetic backgrounds.** Mean pumping frequency in favored and non-favored food is shown for or AEA-exposed animals (AEA+) and unexposed controls (AEA-). Favored food, DA1877, OD 0.8; non-favored food, DA1885, OD 0.8. For statistics, see Supp. Table 5. Symbols: \*\*,  $p < 0.01$ ; \*\*\*,  $p < 0.001$ . Error bars, 95% confidence intervals.

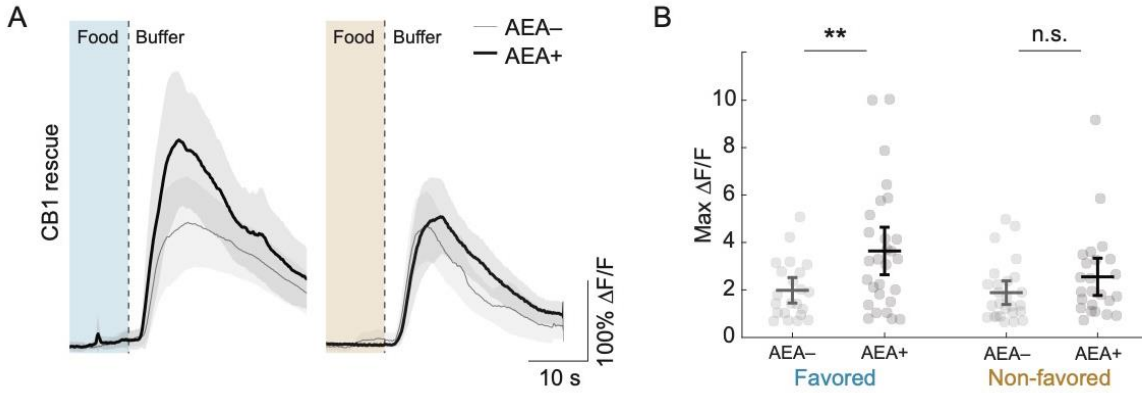

**Supp. Fig 4. CB1 partial rescue of AEA sensitivity in AWC neurons.** **A.** Effect of AEA on the response of AWC neurons to the removal of favored or non-favored food in *npr-19* mutants in which CB1 was overexpressed under control of the *npr-19* promoter. Each trace is average normalized fluorescence change ( $\Delta F/F$ ) versus time. Favored food (blue), DA1877, OD 1; non-favored food (orange), DA1885, OD 1. **B.** Summary of the data in **A**, showing mean peak  $\Delta F/F$ . For statistics in **A-B**, see Supp. Table 5. Symbols: \*\*,  $p < 0.01$ . Error bars or shading, 95% confidence intervals.

| Line | Figure              | Condition                                                                              | Narrative                                                                                                                                                                                                                 | Test                                             | Measure                              | Units of replication               | Number of replicates        | Statistic         | p-value          | Significance | Condition 1<br>avg ± s.d.    | Condition 2<br>avg ± s.d.        | Effect size | Note               |
|------|---------------------|----------------------------------------------------------------------------------------|---------------------------------------------------------------------------------------------------------------------------------------------------------------------------------------------------------------------------|--------------------------------------------------|--------------------------------------|------------------------------------|-----------------------------|-------------------|------------------|--------------|------------------------------|----------------------------------|-------------|--------------------|
| 1    | 1B, 1C              | T-maze<br>Favored (DA1877) OD 1<br>Non-Favored (DA1885) OD 1<br>AEA- vs AEA+           | AEA increases preference for favored food (main effect of AEA)                                                                                                                                                            | Two-factor ANOVA, repeated measures              | Preference index over time           | Assay plate (7-117 animals/plate)  | n=41 (AEA-)<br>n=40 (AEA+)  |                   |                  |              |                              |                                  |             |                    |
| 2    |                     |                                                                                        |                                                                                                                                                                                                                           | <b>Main effect of AEA</b>                        |                                      |                                    |                             | $F(1,79) = 11.88$ | <b>0.001</b> *** |              | $0.49 \pm 0.09$<br>(AEA-)    | $0.66 \pm 0.06$<br>(AEA+)        | <b>0.12</b> |                    |
| 3    |                     |                                                                                        |                                                                                                                                                                                                                           | <b>Main effect of time</b>                       |                                      |                                    |                             | $F(1,79) = 1.73$  | <b>0.162</b>     |              |                              |                                  |             |                    |
| 4    |                     |                                                                                        |                                                                                                                                                                                                                           | <b>Interaction, AEA × time</b>                   |                                      |                                    |                             | $F(1,79) = 1.18$  | <b>0.281</b>     |              |                              |                                  |             |                    |
| 5    | 1D<br>Supp. Fig. 1A | T-maze<br>Favored (DA1877) OD 0.5<br>Non-Favored (DA1885) OD 3<br>AEA- vs AEA+         | AEA increases preference for favored food when there is no baseline preference for either food (main effect of AEA). The main effect of time reflects a slight increase in preference observed after 15-30 min.           | Two-factor ANOVA, repeated measures              | Preference index over time           | Assay plate (36-135 animals/plate) | n=20 (AEA-)<br>n=17 (AEA+)  |                   |                  |              |                              |                                  |             |                    |
| 6    |                     |                                                                                        |                                                                                                                                                                                                                           | <b>Main effect of AEA</b>                        |                                      |                                    |                             | $F(1,35) = 7.58$  | <b>0.008</b> **  |              | $0.09 \pm 0.15$<br>(AEA-)    | $0.41 \pm 0.17$<br>(AEA+)        | <b>0.18</b> |                    |
| 7    |                     |                                                                                        |                                                                                                                                                                                                                           | <b>Main effect of time</b>                       |                                      |                                    |                             | $F(1,35) = 4.18$  | <b>0.045</b> **  |              |                              |                                  |             |                    |
| 8    |                     |                                                                                        |                                                                                                                                                                                                                           | <b>Interaction, AEA × time</b>                   |                                      |                                    |                             | $F(1,35) = 2.18$  | <b>0.153</b>     |              |                              |                                  |             |                    |
| 9    | 1E<br>Supp. Fig. 1B | T-maze<br>Favored (DA1877) OD 0.5<br>Non-Favored (DA1885) OD 8<br>AEA- vs AEA+         | AEA increases preference for favored food when there is no baseline preference for either food (main effect of AEA). The mild interaction time X AEA reflects a slight drop in preference after 45 min in the AEA- group. | Two-factor ANOVA, repeated measures, interaction | Preference index over time           | Assay plate (7-76 animals/plate)   | n=26 (AEA-)<br>n=29 (AEA+)  |                   |                  |              |                              |                                  |             |                    |
| 10   |                     |                                                                                        |                                                                                                                                                                                                                           | <b>Main effect of AEA</b>                        |                                      |                                    |                             | $F(1,44) = 11.16$ | <b>0.001</b> *** |              | $0.00 \pm 0.00$<br>(AEA-)    | $0.20 \pm 0.09$<br>(AEA+)        | <b>0.07</b> |                    |
| 11   |                     |                                                                                        |                                                                                                                                                                                                                           | <b>Main effect of time</b>                       |                                      |                                    |                             | $F(1,44) = 1.15$  | <b>0.291</b>     |              |                              |                                  |             |                    |
| 12   |                     |                                                                                        |                                                                                                                                                                                                                           | <b>Interaction, AEA × time</b>                   |                                      |                                    |                             | $F(1,44) = 2.18$  | <b>0.153</b>     |              |                              |                                  |             |                    |
| 13   | 1F<br>Supp. Fig. 1C | T-maze<br>Favored (HB101) OD 0.5<br>Non-Favored (DA837) OD 2.2<br>AEA- vs AEA+         | AEA increases preference for favored food in a different pair of bacteria (main effect of AEA).                                                                                                                           | Two-factor ANOVA, repeated measures              | Preference index over time           | Assay plate (12-117 animals/plate) | n=36 (AEA-)<br>n=35 (AEA+)  |                   |                  |              |                              |                                  |             |                    |
| 14   |                     |                                                                                        |                                                                                                                                                                                                                           | <b>Main effect of AEA</b>                        |                                      |                                    |                             | $F(1,73) = 5.26$  | <b>0.023</b> *   |              | $-0.16 \pm 0.08$<br>(AEA-)   | $0.01 \pm 0.17$<br>(AEA+)        | <b>0.04</b> |                    |
| 15   |                     |                                                                                        |                                                                                                                                                                                                                           | <b>Main effect of time</b>                       |                                      |                                    |                             | $F(1,73) = 0.26$  | <b>0.612</b>     |              |                              |                                  |             |                    |
| 16   |                     |                                                                                        |                                                                                                                                                                                                                           | <b>Interaction, AEA × time</b>                   |                                      |                                    |                             | $F(1,73) = 0.63$  | <b>0.427</b>     |              |                              |                                  |             |                    |
| 17   | 1G                  | T-maze<br>Favored (DA1877) OD 1<br>AEA- vs AEA+                                        | AEA increases the fraction of worms in favored food (main effect of AEA). The effect of time reflects the progressive accumulation of worms in food. The interaction is ordinal.                                          | Two-factor ANOVA, repeated measures              | Fraction of worms in favored food    | Assay plate (7-117 animals/plate)  | n=41 (AEA-)<br>n=40 (AEA+)  |                   |                  |              |                              |                                  |             | Same data as in 1B |
| 18   |                     |                                                                                        |                                                                                                                                                                                                                           | <b>Main effect of AEA</b>                        |                                      |                                    |                             | $F(1,79) = 23.52$ | <b>0.000</b> *** |              | $0.42 \pm 0.03$<br>(AEA-)    | $0.54 \pm 0.03$<br>(AEA+)        | <b>0.22</b> |                    |
| 19   |                     |                                                                                        |                                                                                                                                                                                                                           | <b>Main effect of time</b>                       |                                      |                                    |                             | $F(1,79) = 25.42$ | <b>0.000</b> *** |              |                              |                                  |             |                    |
| 20   |                     |                                                                                        |                                                                                                                                                                                                                           | <b>Interaction, AEA × time</b>                   |                                      |                                    |                             | $F(1,79) = 3.00$  | <b>0.081</b> *   |              |                              |                                  |             |                    |
| 21   | 1G                  | T-maze<br>Non-Favored (DA1885) OD 1<br>AEA- vs AEA+                                    | AEA decreases the fraction of worms in non-favored food (main effect of AEA). The effect of time reflects the progressive accumulation of worms in food.                                                                  | Two-factor ANOVA, repeated measures              | Fraction in non-favored food         | Assay plate (7-117 animals/plate)  | n=41 (AEA-)<br>n=40 (AEA+)  |                   |                  |              |                              |                                  |             | Same data as in 1B |
| 22   |                     |                                                                                        |                                                                                                                                                                                                                           | <b>Main effect of AEA</b>                        |                                      |                                    |                             | $F(1,79) = 4.24$  | <b>0.043</b> *   |              | $0.15 \pm 0.03$<br>(AEA-)    | $0.11 \pm 0.02$<br>(AEA+)        | <b>0.06</b> |                    |
| 23   |                     |                                                                                        |                                                                                                                                                                                                                           | <b>Main effect of time</b>                       |                                      |                                    |                             | $F(1,79) = 32.85$ | <b>0.000</b> *** |              |                              |                                  |             |                    |
| 24   |                     |                                                                                        |                                                                                                                                                                                                                           | <b>Interaction, AEA × time</b>                   |                                      |                                    |                             | $F(1,79) = 1.28$  | <b>0.265</b>     |              |                              |                                  |             |                    |
| 25   | 1I                  | Electropharyngeogram<br>AEA-<br>Favored (DA1877) OD 0.8 vs non-favored (DA1885) OD 0.8 | AEA- pumping frequency does not differ between favored and non-favored food.                                                                                                                                              | Mann-Whitney                                     | Frequency of pumps in EPG recordings | Individual worm                    | n=67 (AEA-)<br>n=124 (AEA+) | U = 2280          | 0.412            |              | $0.46 \pm 0.17$<br>(favored) | $0.45 \pm 0.14$<br>(non-favored) |             |                    |
| 26   | 1I                  | Electropharyngeogram<br>Favored (DA1877) OD 0.8<br>AEA- vs AEA+                        | AEA increases pumping in presence of favored food.                                                                                                                                                                        | Mann-Whitney                                     | Frequency of pumps in EPG recordings | Individual worm                    | n=67 (AEA-)<br>n=67 (AEA+)  | U = 1667.5        | 0.010 *          |              | $0.46 \pm 0.17$<br>(AEA-)    | $0.98 \pm 0.17$<br>(AEA+)        | 0.53        |                    |
| 27   | 1I                  | Electropharyngeogram<br>Non-Favored (DA1885) OD 0.8<br>AEA- vs AEA+                    | AEA decreases pumping in presence of non-favored food.                                                                                                                                                                    | Mann-Whitney                                     | Frequency of pumps in EPG recordings | Individual worm                    | n=74 (AEA-)<br>n=124 (AEA+) | U = 3196.5        | 0.000 ***        |              | $0.45 \pm 0.14$<br>(AEA-)    | $0.23 \pm 0.08$<br>(AEA+)        | -0.43       |                    |

**Supplemental Table 1. Statistics for Fig. 1 and Supp. Fig. 1.** Experimental conditions and comparisons tested are described in column 3. Stars in the Significance column indicate significance levels: \*,  $p < 0.05$ ; \*\*,  $p < 0.01$ ; \*\*\*,  $p < 0.001$ . Effect sizes were computed as described in Materials and Methods and 95% confidence intervals were used as a dispersion measure.

| Line | Figure                | Condition                                                                                 | Narrative                                                                                                                                                                                                                                                                                                                                             | Test                                | Measure                    | Units of replication               | Number of replicates                                                                            | Statistic       | p-value | Significance | Condition 1 avg +/-CI | Condition 2 avg +/-CI | Effect size | Note                       |
|------|-----------------------|-------------------------------------------------------------------------------------------|-------------------------------------------------------------------------------------------------------------------------------------------------------------------------------------------------------------------------------------------------------------------------------------------------------------------------------------------------------|-------------------------------------|----------------------------|------------------------------------|-------------------------------------------------------------------------------------------------|-----------------|---------|--------------|-----------------------|-----------------------|-------------|----------------------------|
| 1    | 2A                    | T-maze, + sodium azide Favored (DA1877) OD 0.5 Non-Favored (DA1885) OD 3 AEA- vs AEA+     | AEA increases preference for favored food in presence of azide (main effect of AEA). The effect of time reflects a drop in preference over time in both AEA- and AEA+ conditions.                                                                                                                                                                     | Two-factor ANOVA, repeated measures | Preference index over time | Assay plate (16-135 animals/plate) | n=12 (AEA-) n=12 (AEA+)                                                                         |                 |         |              |                       |                       |             |                            |
| 2    |                       |                                                                                           |                                                                                                                                                                                                                                                                                                                                                       | Main effect of AEA                  |                            |                                    |                                                                                                 | F(1,22)= 11.71  | 0.002   | **           | 0.08 ± 0.09           | 0.26 ± 0.07           | 0.35        |                            |
| 3    |                       |                                                                                           |                                                                                                                                                                                                                                                                                                                                                       | Main effect of time                 |                            |                                    |                                                                                                 | F(3,22)= 3.70   | 0.016   | *            |                       |                       |             |                            |
| 4    |                       |                                                                                           |                                                                                                                                                                                                                                                                                                                                                       | Interaction, AEA × time             |                            |                                    |                                                                                                 | F(3,66)= 0.26   | 0.146   |              |                       |                       |             |                            |
| 5    | 2B, Suppl. Fig 2A, B, | T-maze Favored (DA1877) OD 0.5 Non-Favored (DA1885) OD 8 <i>ceh-36</i> vs N2 AEA- vs AEA+ | <i>ceh-36</i> is necessary for the effect of AEA on food preference. A moderate interaction is accompanied by a clear effect of AEA in N2, an absence of effect in <i>ceh-36</i> as well as a clear difference between the two strains in the presence of the drug.                                                                                   | Two-factor ANOVA                    | Preference                 | Assay plate (17-123 animals/plate) | n=86 (N2 AEA-) n=59 (N2 AEA+) n=24 ( <i>ceh-36</i> AEA-) n=21 ( <i>ceh-36</i> AEA+)             |                 |         |              |                       |                       |             | Same N2 data as in Fig. 1E |
| 6    |                       |                                                                                           |                                                                                                                                                                                                                                                                                                                                                       | Main effect of strain               |                            |                                    |                                                                                                 | F(1,79)= 3.27   | 0.074   |              |                       |                       |             |                            |
| 7    |                       |                                                                                           |                                                                                                                                                                                                                                                                                                                                                       | Main effect of AEA                  |                            |                                    |                                                                                                 | F(1,79)= 1.98   | 0.164   |              |                       |                       |             |                            |
| 8    |                       |                                                                                           |                                                                                                                                                                                                                                                                                                                                                       | Interaction, AEA × strain           |                            |                                    |                                                                                                 | F(1,79)= 3.15   | 0.080   | *            |                       |                       |             |                            |
| 9    |                       |                                                                                           |                                                                                                                                                                                                                                                                                                                                                       | Planned comparisons, t-test         |                            |                                    |                                                                                                 |                 |         |              |                       |                       |             |                            |
| 10   |                       |                                                                                           |                                                                                                                                                                                                                                                                                                                                                       | N2, AEA- vs AEA+                    |                            |                                    |                                                                                                 | t(79)= -2.16    | 0.034   | *            | 0.34 ± 0.20           | 0.58 ± 0.13           | 0.67        |                            |
| 11   |                       |                                                                                           |                                                                                                                                                                                                                                                                                                                                                       | <i>ceh-36</i> , AEA- vs AEA+        |                            |                                    |                                                                                                 | t(79)= -0.27    | 0.787   |              | 0.34 ± 0.15           | 0.32 ± 0.12           |             |                            |
| 12   |                       |                                                                                           |                                                                                                                                                                                                                                                                                                                                                       | AEA- vs AEA+                        |                            |                                    |                                                                                                 | t(79)= 0.02     | 0.981   |              | 0.34 ± 0.20           | 0.34 ± 0.15           |             |                            |
| 13   |                       |                                                                                           |                                                                                                                                                                                                                                                                                                                                                       | N2 vs <i>ceh-36</i>                 |                            |                                    |                                                                                                 | t(79)= 2.53     | 0.012   | **           | (N2)                  | ( <i>ceh-36</i> )     | 1.0         |                            |
| 14   | 2D                    | AWC calcium imaging N2 Favored (DA1877) OD 1 vs non-favored (DA1885) OD 1 AEA- vs AEA+    | AEA increases and decreases AWC response to favored and non-favored food, respectively. AWC responses to favored and non-favored are not different in the absence of AEA. Although main effects are non-significant, further analysis of the significant interaction reveals opposing effects of AEA on AWC response to favored and non-favored food. | Two-factor ANOVA                    | DF/F                       | individual worm                    | n= 28 (Favored, AEA-) n= 32 (Favored, AEA+) n= 30 (Non-favored, AEA-) n= 29 (Non-favored, AEA+) |                 |         |              |                       |                       |             |                            |
| 15   |                       |                                                                                           |                                                                                                                                                                                                                                                                                                                                                       | Main effect of bacteria             |                            |                                    |                                                                                                 | F(1,115)= 3.17  | 0.078   |              |                       |                       |             |                            |
| 16   |                       |                                                                                           |                                                                                                                                                                                                                                                                                                                                                       | Main effect of AEA                  |                            |                                    |                                                                                                 | F(1,115)= 0.89  | 0.349   |              |                       |                       |             |                            |
| 17   |                       |                                                                                           |                                                                                                                                                                                                                                                                                                                                                       | Interaction, AEA × bacteria         |                            |                                    |                                                                                                 | F(1,115)= 11.98 | 0.001   | ***          |                       |                       |             |                            |
| 18   |                       |                                                                                           |                                                                                                                                                                                                                                                                                                                                                       | Planned comparisons, t-test         |                            |                                    |                                                                                                 |                 |         |              |                       |                       |             |                            |
| 19   |                       |                                                                                           |                                                                                                                                                                                                                                                                                                                                                       | Favored                             |                            |                                    |                                                                                                 | t(58)= 2.68     | 0.010   | **           | 1.98 ± 0.62           | 3.38 ± 0.83           | 0.34        |                            |
| 20   |                       |                                                                                           |                                                                                                                                                                                                                                                                                                                                                       | AEA- vs AEA+ Non-favored            |                            |                                    |                                                                                                 | t(57)= -2.23    | 0.030   | *            | 2.56 ± 0.53           | 1.75 ± 0.53           | -0.4        |                            |
| 21   |                       |                                                                                           |                                                                                                                                                                                                                                                                                                                                                       | AEA- vs AEA+ Favored                |                            |                                    |                                                                                                 | t(56)= 1.45     | 0.152   |              | 1.98 ± 0.62           | 2.56 ± 0.53           |             |                            |
| 22   |                       |                                                                                           |                                                                                                                                                                                                                                                                                                                                                       | Favored vs Non-favored AEA+         |                            |                                    |                                                                                                 | t(59)= -3.30    | 0.002   | **           | Favored)              | (Non-favored)         | 0.4         |                            |
|      |                       |                                                                                           |                                                                                                                                                                                                                                                                                                                                                       | Favored vs Non-favored              |                            |                                    |                                                                                                 |                 |         |              | Favored)              | (Non-favored)         |             |                            |

**Supplemental Table 2. Statistics for Fig. 2 and Supp. Fig. 2 A, B.** Experimental conditions and comparisons tested are described in column 3. Stars in the Significance column indicate significance levels: \*,  $p < 0.05$ ; \*\*,  $p < 0.01$ ; \*\*\*,  $p < 0.001$ . Effect sizes were computed as described in Materials and Methods and 95% confidence intervals were used as a dispersion measure.

| Line | Figure              | Condition                                                                                        | Narrative                                                                                                                                                                                                                                                                                                  | Test                        | Measure                    | Units of replication              | Number of replicates                                                                            | Statistic                                                              | p-value | Significance | Condition 1 avg +/- CI | Condition 2 avg +/- CI | Effect size | Note                       |
|------|---------------------|--------------------------------------------------------------------------------------------------|------------------------------------------------------------------------------------------------------------------------------------------------------------------------------------------------------------------------------------------------------------------------------------------------------------|-----------------------------|----------------------------|-----------------------------------|-------------------------------------------------------------------------------------------------|------------------------------------------------------------------------|---------|--------------|------------------------|------------------------|-------------|----------------------------|
| 1    | 3A, Supp. Fig 2C, D | T-maze Favored (DA1877) OD 0.5 Non-Favored (DA1885) OD 8 <i>npr-19</i> null vs N2 AEA- vs AEA+   | <i>npr-19</i> is necessary for the effect of AEA on food preference. Although the ANOVA indicates an effect of AEA, that effect is restricted to N2 in t-tests.                                                                                                                                            | Two-factor ANOVA            | Preference index over time | Assay plate (7-85 animals/plate)  | n=86 (N2 AEA-) n=59 (N2 AEA+) n=24 ( <i>npr-19</i> null AEA-) n=24 ( <i>npr-19</i> null AEA+)   | F(1,189)= 1.29 0.259<br>F(1,189)= 5.15 0.024<br>F(1,189)= 1.38 0.243   |         |              |                        |                        |             | Same N2 data as in Fig. 1E |
| 5    |                     |                                                                                                  |                                                                                                                                                                                                                                                                                                            | Planned comparisons, t-test |                            |                                   |                                                                                                 |                                                                        |         |              |                        |                        |             |                            |
| 6    |                     |                                                                                                  |                                                                                                                                                                                                                                                                                                            |                             |                            |                                   |                                                                                                 |                                                                        |         |              |                        |                        |             |                            |
| 7    |                     |                                                                                                  |                                                                                                                                                                                                                                                                                                            |                             |                            |                                   |                                                                                                 |                                                                        |         |              |                        |                        |             |                            |
| 8    |                     |                                                                                                  |                                                                                                                                                                                                                                                                                                            |                             |                            |                                   |                                                                                                 |                                                                        |         |              |                        |                        |             |                            |
| 9    |                     |                                                                                                  |                                                                                                                                                                                                                                                                                                            |                             |                            |                                   |                                                                                                 |                                                                        |         |              |                        |                        |             |                            |
| 10   | 3A, Supp. Fig 2C, E | T-maze Favored (DA1877) OD 0.5 Non-Favored (DA1885) OD 8 <i>npr-19</i> rescue vs N2 AEA- vs AEA+ | <i>npr-19</i> expression rescues the effect of AEA in <i>npr-19</i> mutants. A significant main effect of AEA is reflected in significant effects of AEA in both N2 and <i>npr-19</i> rescue in t-tests. Moreover the effect of AEA is similar in both strains (t-test: AEA+, N2 vs <i>npr-19</i> rescue). | Two-factor ANOVA            | Preference index over time | Assay plate (7-76 animals/plate)  | n=86 (N2 AEA-) n=59 (N2 AEA+) n=24( <i>npr-19</i> rescue AEA-) n=24( <i>npr-19</i> rescue AEA+) | F(1,189)= 0.97 0.329<br>F(1,189)= 5.15 0.024<br>F(1,189)= 0.02 0.88047 |         |              |                        |                        |             | Same N2 data as in Fig. 1E |
| 14   |                     |                                                                                                  |                                                                                                                                                                                                                                                                                                            | Planned comparisons, t-test |                            |                                   |                                                                                                 |                                                                        |         |              |                        |                        |             |                            |
| 15   |                     |                                                                                                  |                                                                                                                                                                                                                                                                                                            |                             |                            |                                   |                                                                                                 |                                                                        |         |              |                        |                        |             |                            |
| 16   |                     |                                                                                                  |                                                                                                                                                                                                                                                                                                            |                             |                            |                                   |                                                                                                 |                                                                        |         |              |                        |                        |             |                            |
| 17   |                     |                                                                                                  |                                                                                                                                                                                                                                                                                                            |                             |                            |                                   |                                                                                                 |                                                                        |         |              |                        |                        |             |                            |
| 18   |                     |                                                                                                  |                                                                                                                                                                                                                                                                                                            |                             |                            |                                   |                                                                                                 |                                                                        |         |              |                        |                        |             |                            |
| 19   | 3A, Supp. Fig 2C, F | T-maze Favored (DA1877) OD 0.5 Non-Favored (DA1885) OD 8 CB1 rescue vs N2 AEA- vs AEA+           | CB1 expression rescues the effect of AEA in <i>npr-19</i> mutants. A significant main effect of AEA is reflected in significant effects of AEA in both N2 and CB1 rescue in t-tests. Moreover, the effect of AEA is similar in both strains (t-test: AEA+, N2 vs CB1 rescue).                              | Two-factor ANOVA            | Preference index over time | Assay plate (4-150 animals/plate) | n=86 (N2 AEA-) n=59 (N2 AEA+) n=27(CB1 rescue AEA-) n=27(CB1 rescue AEA+)                       | F(1,195)= 0.97 0.329<br>F(1,195)= 5.15 0.024<br>F(1,195)= 0.41 0.521   |         |              |                        |                        |             | Same N2 data as in Fig. 1E |
| 23   |                     |                                                                                                  |                                                                                                                                                                                                                                                                                                            | Planned comparisons, t-test |                            |                                   |                                                                                                 |                                                                        |         |              |                        |                        |             |                            |
| 24   |                     |                                                                                                  |                                                                                                                                                                                                                                                                                                            |                             |                            |                                   |                                                                                                 |                                                                        |         |              |                        |                        |             |                            |
| 25   |                     |                                                                                                  |                                                                                                                                                                                                                                                                                                            |                             |                            |                                   |                                                                                                 |                                                                        |         |              |                        |                        |             |                            |
| 26   |                     |                                                                                                  |                                                                                                                                                                                                                                                                                                            |                             |                            |                                   |                                                                                                 |                                                                        |         |              |                        |                        |             |                            |
| 27   |                     |                                                                                                  |                                                                                                                                                                                                                                                                                                            |                             |                            |                                   |                                                                                                 |                                                                        |         |              |                        |                        |             |                            |
| 28   | 3C                  | AWC calcium imaging Favored (DA1877) OD 1 <i>npr-19</i> null vs N2 AEA- vs AEA+                  | AEA no longer modulates AWC response to favored food in <i>npr-19</i> mutants. There is no main effect of AEA or effect of AEA in t-tests. In absence of AEA, the response of AWC is elevated relative to N2 controls.                                                                                     | Two-factor ANOVA            | ΔF/F                       | individual worm                   | n= 28 (N2 AEA-) n= 32 (N2 AEA+) n= 35 ( <i>npr-19</i> , AEA+) n= 35 ( <i>npr-19</i> , AEA+)     | F(1,126)= 1.67 0.198<br>F(1,126)= 1.60 0.208<br>F(1,126)= 5.42 0.022   |         |              |                        |                        |             | Same N2 data as in Fig. 2C |
| 33   |                     |                                                                                                  |                                                                                                                                                                                                                                                                                                            | Planned comparisons, t-test |                            |                                   |                                                                                                 |                                                                        |         |              |                        |                        |             |                            |
| 34   |                     |                                                                                                  |                                                                                                                                                                                                                                                                                                            |                             |                            |                                   |                                                                                                 |                                                                        |         |              |                        |                        |             |                            |
| 35   |                     |                                                                                                  |                                                                                                                                                                                                                                                                                                            |                             |                            |                                   |                                                                                                 |                                                                        |         |              |                        |                        |             |                            |
| 36   |                     |                                                                                                  |                                                                                                                                                                                                                                                                                                            |                             |                            |                                   |                                                                                                 |                                                                        |         |              |                        |                        |             |                            |
| 37   | 3C                  | AWC calcium imaging Non-Favored (DA1885) OD 1 <i>npr-19</i> mutants vs N2 AEA- vs AEA+           | AEA no longer modulates AWC response to non-favored food in <i>npr-19</i> mutants. There is no main effect of AEA or effect of AEA in t-tests. In absence of AEA, the response of AWC is elevated relative to N2 controls.                                                                                 | Two-factor ANOVA            | ΔF/F                       | individual worm                   | n= 30 (N2 AEA-) n= 29 (N2 AEA+) n= 37 ( <i>npr-19</i> , AEA+) n= 36 ( <i>npr-19</i> , AEA+)     | F(1,126)= 50.22 0.000<br>F(1,126)= 0.79 0.371<br>F(1,126)= 0.13 0.721  |         |              |                        |                        |             | Same N2 data as in Fig. 2C |
| 41   |                     |                                                                                                  |                                                                                                                                                                                                                                                                                                            | Planned comparisons, t-test |                            |                                   |                                                                                                 |                                                                        |         |              |                        |                        |             |                            |
| 42   |                     |                                                                                                  |                                                                                                                                                                                                                                                                                                            |                             |                            |                                   |                                                                                                 |                                                                        |         |              |                        |                        |             |                            |
| 43   |                     |                                                                                                  |                                                                                                                                                                                                                                                                                                            |                             |                            |                                   |                                                                                                 |                                                                        |         |              |                        |                        |             |                            |
| 44   |                     |                                                                                                  |                                                                                                                                                                                                                                                                                                            |                             |                            |                                   |                                                                                                 |                                                                        |         |              |                        |                        |             |                            |
| 45   |                     |                                                                                                  |                                                                                                                                                                                                                                                                                                            |                             |                            |                                   |                                                                                                 |                                                                        |         |              |                        |                        |             |                            |

**Supplemental Table 3. Statistics for Fig. 3 and Supp. Fig. 2 C-F.** Experimental conditions and comparisons tested are described in column 3. Stars in the Significance column indicate significance levels: \*,  $p < 0.05$ ; \*\*,  $p < 0.01$ ; \*\*\*,  $p < 0.001$ . Effect sizes were computed as described in Materials and Methods and 95% confidence intervals were used as a dispersion measure.

| Line | Figure | Condition                                                                      | Narrative                                                                                                                                                                                                                                                                              | Test             | Measure      | Units of replication | Number of replicates                                                                          | Statistic                   | p-value          | Significance | Condition 1<br>avg +/- CI | Condition 2<br>avg +/- CI     | Effect size | Note |
|------|--------|--------------------------------------------------------------------------------|----------------------------------------------------------------------------------------------------------------------------------------------------------------------------------------------------------------------------------------------------------------------------------------|------------------|--------------|----------------------|-----------------------------------------------------------------------------------------------|-----------------------------|------------------|--------------|---------------------------|-------------------------------|-------------|------|
| 1    | 4C     | AWC calcium imaging Favored (DA1877) OD 1 <i>unc-13</i> vs N2 AEA- vs AEA+     | In <i>unc-13</i> mutants, AEA increases AWC response to favored food in a manner similar to that seen in N2. The significant main effect of strain reflects slightly elevated AWC responses in <i>unc-13</i> compared to N2 controls, both at baseline and in AEA-treated animals.     | Two-factor ANOVA | $\Delta F/F$ | individual worm      | n= 27 ( <i>unc-13</i> , AEA-) n= 27 ( <i>unc-13</i> , AEA+) n= 28 (N2, AEA-) n= 32 (N2, AEA+) |                             |                  |              |                           |                               |             |      |
| 2    |        |                                                                                |                                                                                                                                                                                                                                                                                        |                  |              |                      |                                                                                               | Main effect of strain       | F(1,109)= 6.650  | 0.011        |                           |                               |             |      |
| 3    |        |                                                                                |                                                                                                                                                                                                                                                                                        |                  |              |                      |                                                                                               | Main effect of AEA          | F(1,109)= 17.031 | 0.000        |                           |                               |             |      |
| 4    |        |                                                                                |                                                                                                                                                                                                                                                                                        |                  |              |                      |                                                                                               | Interaction, AEA x strain   | F(1,109)= 0.134  | 0.719        |                           |                               |             |      |
| 5    |        |                                                                                |                                                                                                                                                                                                                                                                                        |                  |              |                      |                                                                                               | Planned comparisons, t-test |                  |              |                           |                               |             |      |
| 6    |        |                                                                                |                                                                                                                                                                                                                                                                                        |                  |              |                      |                                                                                               | <i>unc-13</i> AEA- vs AEA+  | t(51)= 3.22      | 0.002        | 2.83 ± 0.66               | 4.49 ± 0.77                   | 0.47        |      |
| 7    |        |                                                                                |                                                                                                                                                                                                                                                                                        |                  |              |                      |                                                                                               | N2 AEA- vs AEA+             | t(58)= -2.68     | 0.010        | 1.98 ± 0.62               | 3.38 ± 0.83                   | 0.34        |      |
| 8    |        |                                                                                |                                                                                                                                                                                                                                                                                        |                  |              |                      |                                                                                               | AEA- vs AEA+ AEA-           | t(52)= 1.87      | 0.067        | 1.98 ± 0.6                | 2.83 ± 0.66                   |             |      |
| 9    |        |                                                                                |                                                                                                                                                                                                                                                                                        |                  |              |                      |                                                                                               | N2 vs <i>unc-13</i> AEA+    | t(57)= 1.97      | 0.054        | (N2) 3.38 ± 0.8           | ( <i>unc-13</i> ) 4.49 ± 0.77 |             |      |
| 10   | 4C     | AWC calcium imaging Non-Favored (DA1885) OD 1 <i>unc-13</i> vs N2 AEA- vs AEA+ | In <i>unc-13</i> mutants, AEA decreases AWC response to non-favored food in a manner similar to that seen in N2. The significant main effect of strain reflects slightly elevated AWC responses in <i>unc-13</i> compared to N2 controls, both at baseline and in AEA-treated animals. | Two-factor ANOVA | $\Delta F/F$ | individual worm      | n= 32 ( <i>unc-13</i> , AEA-) n= 33 ( <i>unc-13</i> , AEA+) n= 30 (N2, AEA-) n= 29 (N2, AEA+) |                             |                  |              |                           |                               |             |      |
| 11   |        |                                                                                |                                                                                                                                                                                                                                                                                        |                  |              |                      |                                                                                               | Main effect of strain       | F(1,120)= 3.94   | 0.050        |                           |                               |             |      |
| 12   |        |                                                                                |                                                                                                                                                                                                                                                                                        |                  |              |                      |                                                                                               | Main effect of AEA          | F(1,120)= 10.80  | 0.001        |                           |                               |             |      |
| 13   |        |                                                                                |                                                                                                                                                                                                                                                                                        |                  |              |                      |                                                                                               | Interaction, AEA x strain   | F(1,120)= 0.20   | 0.6519       |                           |                               |             |      |
| 14   |        |                                                                                |                                                                                                                                                                                                                                                                                        |                  |              |                      |                                                                                               | Planned comparisons, t-test |                  |              |                           |                               |             |      |
| 15   |        |                                                                                |                                                                                                                                                                                                                                                                                        |                  |              |                      |                                                                                               | <i>unc-13</i> AEA- vs AEA+  | t(63)= -2.42     | 0.019        | 2.56 ± 0.5                | 2.2 ± 0.47                    | -0.34       |      |
| 16   |        |                                                                                |                                                                                                                                                                                                                                                                                        |                  |              |                      |                                                                                               | N2 AEA- vs AEA+             | t(57)= -2.23     | 0.030        | 2.56 ± 0.53               | 1.75 ± 0.53                   | -0.4        |      |
| 17   |        |                                                                                |                                                                                                                                                                                                                                                                                        |                  |              |                      |                                                                                               | AEA- vs AEA+ AEA-           | t(60)= 1.58      | 0.119        | 2.56 ± 0.5                | 2.56 ± 0.5                    |             |      |
| 18   |        |                                                                                |                                                                                                                                                                                                                                                                                        |                  |              |                      |                                                                                               | N2 vs <i>unc-13</i> AEA+    | t(60)= 1.51      | 0.137        | (N2) 3.27 ± 0.72          | ( <i>unc-13</i> ) 3.27 ± 0.72 |             |      |
| 19   | 4E     | AWC calcium imaging Favored (DA1877) OD 1 <i>unc-31</i> vs N2 AEA- vs AEA+     | In <i>unc-31</i> mutants, AEA no longer increases AWC response to favored food. The interaction AEA x strain reflects the effect of AEA on N2 and its absence in <i>unc-31</i> .                                                                                                       | Two-factor ANOVA | $\Delta F/F$ | individual worm      | n= 25 ( <i>unc-31</i> , AEA-) n= 24 ( <i>unc-31</i> , AEA+) n= 28 (N2, AEA-) n= 32 (N2, AEA+) |                             |                  |              |                           |                               |             |      |
| 20   |        |                                                                                |                                                                                                                                                                                                                                                                                        |                  |              |                      |                                                                                               | Main effect of strain       | F(1,99)= 1.98    | 0.165        |                           |                               |             |      |
| 21   |        |                                                                                |                                                                                                                                                                                                                                                                                        |                  |              |                      |                                                                                               | Main effect of AEA          | F(1,99)= 11.22   | 0.001        |                           |                               |             |      |
| 22   |        |                                                                                |                                                                                                                                                                                                                                                                                        |                  |              |                      |                                                                                               | Interaction, AEA x strain   | F(1,99)= 0.22    | 0.635        |                           |                               |             |      |
| 23   |        |                                                                                |                                                                                                                                                                                                                                                                                        |                  |              |                      |                                                                                               | Planned comparisons, t-test | F(1,99)= 9.54    | 0.003        |                           |                               |             |      |
| 24   |        |                                                                                |                                                                                                                                                                                                                                                                                        |                  |              |                      |                                                                                               | <i>unc-31</i> AEA- vs AEA+  | t(47)= -1.75     | 0.087        | 2.62 ± 0.73               | 1.8 ± 0.57                    |             |      |
| 25   |        |                                                                                |                                                                                                                                                                                                                                                                                        |                  |              |                      |                                                                                               | N2 AEA- vs AEA+             | t(51)= -2.68     | 0.010        | 1.98 ± 0.62               | 3.38 ± 0.83                   | 0.34        |      |
| 26   |        |                                                                                |                                                                                                                                                                                                                                                                                        |                  |              |                      |                                                                                               | AEA- vs AEA+ AEA-           | t(51)= 1.34      | 0.187        | 1.98 ± 0.6                | 2.62 ± 0.73                   |             |      |
| 27   |        |                                                                                |                                                                                                                                                                                                                                                                                        |                  |              |                      |                                                                                               | N2 vs <i>unc-31</i> AEA+    | t(54)= -3.13     | 0.003        | (N2) 3.31 ± 0.68          | ( <i>unc-31</i> ) 3.31 ± 0.68 |             |      |
| 28   | 4E     | AWC calcium imaging Non-Favored (DA1985) OD 1 <i>unc-31</i> vs N2 AEA- vs AEA+ | In <i>unc-31</i> mutants, AEA increases AWC response to non-favored food, which is the opposite of its effect in N2 controls.                                                                                                                                                          | Two-factor ANOVA | $\Delta F/F$ | individual worm      | n= 19 ( <i>unc-31</i> , AEA-) n= 25 ( <i>unc-31</i> , AEA+) n= 30 (N2, AEA-) n= 29 (N2, AEA+) |                             |                  |              |                           |                               |             |      |
| 29   |        |                                                                                |                                                                                                                                                                                                                                                                                        |                  |              |                      |                                                                                               | Main effect of strain       | F(1,99)= 0.13    | 0.717        |                           |                               |             |      |
| 30   |        |                                                                                |                                                                                                                                                                                                                                                                                        |                  |              |                      |                                                                                               | Main effect of AEA          | F(1,99)= 3.78    | 0.055        |                           |                               |             |      |
| 31   |        |                                                                                |                                                                                                                                                                                                                                                                                        |                  |              |                      |                                                                                               | Interaction, AEA x strain   | F(1,99)= 11.26   | 0.001        |                           |                               |             |      |
| 32   |        |                                                                                |                                                                                                                                                                                                                                                                                        |                  |              |                      |                                                                                               | Planned comparisons, t-test |                  |              |                           |                               |             |      |
| 33   |        |                                                                                |                                                                                                                                                                                                                                                                                        |                  |              |                      |                                                                                               | <i>unc-31</i> AEA- vs AEA+  | t(42)= 2.42      | 0.020        | 2.56 ± 0.5                | 3.31 ± 0.68                   | 0.43        |      |
| 34   |        |                                                                                |                                                                                                                                                                                                                                                                                        |                  |              |                      |                                                                                               | N2 AEA- vs AEA+             | t(57)= -2.23     | 0.030        | 2.56 ± 0.53               | 1.75 ± 0.53                   | -0.4        |      |
| 35   |        |                                                                                |                                                                                                                                                                                                                                                                                        |                  |              |                      |                                                                                               | AEA- vs AEA+ AEA-           | t(47)= -1.1      | 0.281        | 2.56 ± 0.5                | 2.04 ± 0.76                   |             |      |
| 36   |        |                                                                                |                                                                                                                                                                                                                                                                                        |                  |              |                      |                                                                                               | N2 vs <i>unc-31</i> AEA+    | t(52)= 3.61      | 0.001        | 1.75 ± 0.5                | 3.31 ± 0.68                   | 0.64        |      |

**Supplemental Table 4. Statistics for Fig. 4.** Experimental conditions and comparisons tested are described in column 3. Stars in the Significance column indicate significance levels: \*,  $p < 0.05$ ; \*\*,  $p < 0.01$ ; \*\*\*,  $p < 0.001$ . Effect sizes were computed as described in Materials and Methods and 95% confidence intervals were used as a dispersion measure.

| Line | Figure       | Condition                                                                    | Narrative                                                                                                                                                                                                                                                                                                                                                                       | Test             | Measure                              | Units of replication | Number of replicates                                                            | Statistic       | p-value | Significance | Condition 1 avg ± CI | Condition 2 avg ± CI     | Effect size | Note                       |
|------|--------------|------------------------------------------------------------------------------|---------------------------------------------------------------------------------------------------------------------------------------------------------------------------------------------------------------------------------------------------------------------------------------------------------------------------------------------------------------------------------|------------------|--------------------------------------|----------------------|---------------------------------------------------------------------------------|-----------------|---------|--------------|----------------------|--------------------------|-------------|----------------------------|
| 1    | Supp. Fig 3  | Electropharyngeogram Favored (DA1877), <i>ceh-36</i> null AEA- vs AEA+       | AEA increases pumping in presence of favored food in <i>ceh-36</i> .                                                                                                                                                                                                                                                                                                            | Mann-Whitney     | Frequency of pumps in EPG recordings | Individual worm      | n=76 (AEA-) n=53 (AEA+)                                                         | U= 888.5        | 0.000   | ***          | 0.9 ± 0.28           | 1.91 ± 0.23              | 0.62        |                            |
| 2    | Supp. Fig 3  | Electropharyngeogram Non-Favored (DA1885), <i>ceh-36</i> null AEA- vs AEA+   | AEA has no effect on pumping in presence of non-favored food in <i>ceh-36</i> .                                                                                                                                                                                                                                                                                                 | Mann-Whitney     | Frequency of pumps in EPG recordings | Individual worm      | n=80 (AEA-) n=88 (AEA+)                                                         | U= 3894         | 0.849   |              | 1.08±0.18 (AEA-)     | 1.14±0.19 (AEA+)         |             |                            |
| 3    | Supp. Fig 3  | Electropharyngeogram Favored (DA1877), <i>npr-19</i> null AEA- vs AEA+       | AEA has no effect on pumping in presence of favored food in <i>npr-19</i> mutants.                                                                                                                                                                                                                                                                                              | Mann-Whitney     | Frequency of pumps in EPG recordings | Individual worm      | n=86 (AEA-) n=77 (AEA+)                                                         | U= 3137.5       | 0.562   |              | 0.93 ± 0.26 (AEA-)   | 0.91 ± 0.28 (AEA+)       |             |                            |
| 4    | Supp. Fig 3  | Electropharyngeogram Non-Favored (DA1885), <i>npr-19</i> null AEA- vs AEA+   | AEA decreases pumping rate in <i>npr-19</i> mutants in presence of non-favored food.                                                                                                                                                                                                                                                                                            | Mann-Whitney     | Frequency of pumps in EPG recordings | Individual worm      | n=44 (AEA-) n=56 (AEA+)                                                         | U= 804.5        | 0.003   | **           | 0.47 ± 0.21 (AEA-)   | 0.23 ± 0.14 (AEA+)       | -0.30       |                            |
| 5    | Supp. Fig 3  | Electropharyngeogram Favored (DA1877), <i>npr-19</i> rescue AEA- vs AEA+     | AEA has no effect on pumping in presence of favored food in <i>npr-19</i> rescue worms.                                                                                                                                                                                                                                                                                         | Mann-Whitney     | Frequency of pumps in EPG recordings | Individual worm      | n=76 (AEA-) n=95 (AEA+)                                                         | U= 3074.5       | 0.097   |              | 1.60 ± 0.32 (AEA-)   | 1.99 ± 0.29 (AEA+)       |             |                            |
| 6    | Supp. Fig 3  | Electropharyngeogram Non-Favored (DA1885), <i>npr-19</i> rescue AEA- vs AEA+ | AEA has no effect on pumping in presence of non-favored food in <i>npr-19</i> rescue worms.                                                                                                                                                                                                                                                                                     | Mann-Whitney     | Frequency of pumps in EPG recordings | Individual worm      | n=67 (AEA-) n=67 (AEA+)                                                         | U= 2222.5       | 0.920   |              | 1.09 ± 0.27 (AEA-)   | 0.96±0.24 (AEA+)         |             |                            |
| 7    | Supp. Fig 3  | Electropharyngeogram Favored (DA1877), CB1 rescue AEA- vs AEA+               | AEA has no effect on pumping in presence of favored food in CB1 rescue worms.                                                                                                                                                                                                                                                                                                   | Mann-Whitney     | Frequency of pumps in EPG recordings | Individual worm      | n=32 (AEA-) n=28 (AEA+)                                                         | U= 388.5        | 0.384   |              | 0.82 ± 0.43 (AEA-)   | 0.49 ± 0.26 (AEA+)       |             |                            |
| 8    | Supp. Fig 3  | Electropharyngeogram Non-Favored (DA1885), CB1 rescue AEA- vs AEA+           | AEA has no effect on pumping in presence of non-favored food in CB1 rescue worms.                                                                                                                                                                                                                                                                                               | Mann-Whitney     | Frequency of pumps in EPG recordings | Individual worm      | n=52 (AEA-) n=25 (AEA+)                                                         | U= 637          | 0.889   |              | 0.73 ± 0.28 (AEA-)   | 0.79 ± 0.43 (AEA+)       |             |                            |
| 9    |              |                                                                              |                                                                                                                                                                                                                                                                                                                                                                                 |                  |                                      |                      |                                                                                 |                 |         |              |                      |                          |             |                            |
| 10   | Supp. Fig 4B | AWC calcium imaging Favored (DA1877) OD 1 CB1 rescue vs N2 AEA- vs AEA+      | CB1 expression restores AEA sensitivity in <i>npr-19</i> mutants in response to favored food. N2 and CB1 rescue are not different (no main effect of strain), and a significant effect of AEA (main effect of AEA) is present. In t-tests, AEA has a significant effect on AWC response in both strains to the same extent (no difference in contrast: AEA+, N2 vs CB1 rescue). | Two-factor ANOVA | ΔF/F                                 | Individual worm      | n=22 (CB1 rescue, AEA-) n=28 (CB1 rescue, AEA+) n=28 (N2, AEA-) n=32 (N2, AEA+) |                 |         |              |                      |                          |             | Same N2 data as in Fig. 2C |
| 11   |              |                                                                              |                                                                                                                                                                                                                                                                                                                                                                                 |                  | Main effect of strain                |                      |                                                                                 | F(1,105)= 0.25  | 0.629   |              |                      |                          |             |                            |
| 12   |              |                                                                              |                                                                                                                                                                                                                                                                                                                                                                                 |                  | Main effect of AEA                   |                      |                                                                                 | F(1,105)= 14.86 | 0.000   |              |                      |                          |             |                            |
| 13   |              |                                                                              |                                                                                                                                                                                                                                                                                                                                                                                 |                  | Interaction, AEA × strain            |                      |                                                                                 | F(1,105)= 0.11  | 0.742   |              |                      |                          |             |                            |
| 14   |              |                                                                              |                                                                                                                                                                                                                                                                                                                                                                                 |                  | Planned comparisons, t-test          |                      |                                                                                 |                 |         |              |                      |                          |             |                            |
| 15   |              |                                                                              |                                                                                                                                                                                                                                                                                                                                                                                 |                  | AEA- vs AEA+ CB1 rescue              |                      |                                                                                 | t(58)= -2.68    | 0.010   | *            | 1.98 ± 0.62 (AEA-)   | 3.91 ± 0.96 (AEA+)       |             |                            |
| 16   |              |                                                                              |                                                                                                                                                                                                                                                                                                                                                                                 |                  | AEA- vs AEA+ N2                      |                      |                                                                                 | t(48)= 0.02     | 0.988   |              | 1.98 ± 0.62 (AEA-)   | 3.38 ± 0.83 (AEA+)       | 0.34        |                            |
| 17   |              |                                                                              |                                                                                                                                                                                                                                                                                                                                                                                 |                  | N2 vs CB1 rescue AEA+                |                      |                                                                                 | t(58)= 0.42     | 0.674   |              | 1.98 ± 0.62 (N2)     | 1.99 ± 0.51 (CB1 rescue) |             |                            |
| 18   |              |                                                                              |                                                                                                                                                                                                                                                                                                                                                                                 |                  | N2 vs CB1 rescue AEA-                |                      |                                                                                 |                 |         |              | 3.38 ± 0.8 (N2)      | 3.84 ± 0.96 (CB1 rescue) |             |                            |
| 19   | Supp. Fig 4B | AWC calcium imaging Non-Favored (DA1885) OD 1 CB1 rescue vs N2 AEA- vs AEA+  | CB1 expression does not restore AEA sensitivity in <i>npr-19</i> mutants in response to non-favored food. The interaction reflects the effect of AEA in N2 and its absence in CB1 rescue.                                                                                                                                                                                       | Two-factor ANOVA | ΔF/F                                 | Individual worm      | n=26 (CB1 rescue, AEA-) n=24 (CB1 rescue, AEA+) n=30 (N2, AEA-) n=29 (N2, AEA+) |                 |         |              |                      |                          |             | Same N2 data as in Fig. 2C |
| 20   |              |                                                                              |                                                                                                                                                                                                                                                                                                                                                                                 |                  | Main effect of strain                |                      |                                                                                 | F(1,105)= 0.03  | 0.859   |              |                      |                          |             |                            |
| 21   |              |                                                                              |                                                                                                                                                                                                                                                                                                                                                                                 |                  | Main effect of AEA                   |                      |                                                                                 | F(1,105)= 0.22  | 0.638   |              |                      |                          |             |                            |
| 22   |              |                                                                              |                                                                                                                                                                                                                                                                                                                                                                                 |                  | Interaction, AEA × strain            |                      |                                                                                 | F(1,105)= 14.74 | 0.011   |              |                      |                          |             |                            |
| 23   |              |                                                                              |                                                                                                                                                                                                                                                                                                                                                                                 |                  | Planned comparisons, t-test          |                      |                                                                                 |                 |         |              |                      |                          |             |                            |
| 24   |              |                                                                              |                                                                                                                                                                                                                                                                                                                                                                                 |                  | AEA- vs AEA+ CB1 rescue              |                      |                                                                                 | t(45)= 1.48     | 0.146   |              | 1.89 ± 0.5 (AEA-)    | 2.55 ± 0.74 (AEA+)       |             |                            |
| 25   |              |                                                                              |                                                                                                                                                                                                                                                                                                                                                                                 |                  | AEA- vs AEA+ N2                      |                      |                                                                                 | t(54)= -2.28    | 0.030   | *            | 2.96 ± 0.93 (AEA-)   | 1.75 ± 0.95 (AEA+)       |             |                            |
| 26   |              |                                                                              |                                                                                                                                                                                                                                                                                                                                                                                 |                  | N2 vs CB1 rescue AEA+                |                      |                                                                                 | t(54)= -1.89    | 0.064   |              | 2.96 ± 0.93 (N2)     | 1.89 ± 0.47 (CB1 rescue) |             |                            |
| 27   |              |                                                                              |                                                                                                                                                                                                                                                                                                                                                                                 |                  | N2 vs CB1 rescue AEA-                |                      |                                                                                 | t(51)= 1.76     | 0.085   |              | 1.75 ± 0.5 (N2)      | 2.55 ± 0.74 (CB1 rescue) |             |                            |

**Supplemental Table 5. Statistics for Supp. Fig. 3, Supp. Fig. 4.** Experimental conditions and comparisons tested are described in column 3. Stars in the Significance column indicate significance levels: \*,  $p < 0.05$ ; \*\*,  $p < 0.01$ ; \*\*\*,  $p < 0.001$ . Effect sizes were computed as described in Materials and Methods and 95% confidence intervals were used as a dispersion measure.

|                  |               | Number of GFP positive cells |              |    |      |
|------------------|---------------|------------------------------|--------------|----|------|
|                  |               | Head                         |              |    | Tail |
| Worm #           | 1             | 28                           | Worm #       | 1  | 7    |
|                  | 2             | 22                           |              | 2  | 9    |
|                  | 3             | 33                           |              | 3  | 10   |
|                  | 4             | 30                           |              | 4  | 9    |
|                  | 5             | 28                           |              | 5  | 9    |
|                  | 6             | 33                           |              | 6  | 8    |
|                  | 7             | 28                           |              | 7  | 9    |
|                  | 8             | 29                           |              | 8  | 8    |
|                  | 9             | 36                           |              | 9  | 7    |
|                  | 10            | 26                           |              | 10 | 9    |
|                  | 11            | 19                           |              | 11 | 8    |
|                  | 12            | 26                           |              | 12 | 7    |
|                  | 13            | 36                           |              | 13 | 9    |
|                  | 14            | 35                           |              | 14 | 8    |
|                  | 15            | 34                           |              | 15 | 7    |
|                  | 16            | 29                           |              | 16 | 9    |
|                  | 17            | 32                           |              | 17 | 8    |
|                  | 18            | 26                           |              | 18 | 7    |
|                  | 19            | 26                           |              | 19 | 8    |
|                  | 20            | 27                           |              | 20 | 7    |
|                  | 21            |                              |              | 21 | 10   |
|                  | 22            |                              |              | 22 | 8    |
| Mean<br>± 95% CI | 29.2<br>± 2.1 | Mean<br>± 95% CI             | 8.2<br>± 0.4 |    |      |

**Supplemental Table 6. Counts of *npr-19*-expressing neurons in the head and tail.** Number of *npr-19::GFP* positive neurons present in the head ( $n = 20$  worms), or the tail ( $n = 22$  worms).
